# Supplementary material for: Interchangeability of light and virtual microscopy for histopathological evaluation of prostate cancer
Source: Springer Nature journal article supplement (doi:10.1038/s41598-021-82911-z), 2021-02-05

**Supplementary Materials for**  
**Interchangeability of light and virtual microscopy for histopathological evaluation of**  
**prostate cancer**

Renata Zelic, Francesca Giunchi, Luca Lianas, Cecilia Mascia, Gianluigi Zanetti, Ove  
Andrén, Jonna Fridfeldt, Jessica Carlsson, Sabina Davidsson, Luca Molinaro, Per Henrik  
Vincent, Lorenzo Richiardi, Olof Akre, Michelangelo Fiorentino, Andreas Pettersson

**Correspondence to:** [renata.zelic@ki.se](mailto:renata.zelic@ki.se)

**Conflict of Interest:** None to declare.

## Table of Contents:

|                                                                                                                                                                                                   |    |
|---------------------------------------------------------------------------------------------------------------------------------------------------------------------------------------------------|----|
| Supplementary methods .....                                                                                                                                                                       | 4  |
| Supplementary Table S1. Histopathological characteristics evaluated on the slide level for 352 slides which were evaluated by both reviewers using both the light and virtual microscopy ...      | 6  |
| Supplementary Table S2. Case-level summary of histopathological characteristics for 60 cases .....                                                                                                | 7  |
| Supplementary Table S3. Reasons for exclusion of diagnostic slides .....                                                                                                                          | 8  |
| Supplementary Figure S1. Bland and Altman plot of the intra-method intra-observer agreement for biopsy core length measured in millimeters, evaluated on the core level.....                      | 9  |
| Supplementary Figure S2. Bland and Altman plot of the intra-method intra-observer agreement for length of tumor in the biopsy core measured in millimeters, evaluated on the core level .....     | 10 |
| Supplementary Figure S3. Intra-method intra-observer agreement for characteristics evaluated on the core level .....                                                                              | 11 |
| Supplementary Figure S4. Intra-method intra-observer agreement for characteristics evaluated on the slide level.....                                                                              | 12 |
| Supplementary Figure S5. Bland and Altman plot of the intra-method intra-observer agreement for the percentage of Gleason pattern 4, evaluated on the core level.....                             | 13 |
| Supplementary Figure S6. Bland and Altman plot of the intra-method inter-observer agreement for biopsy core length measured in millimeters, evaluated on the core level.....                      | 14 |
| Supplementary Figure S7. Bland and Altman plot of the intra-method inter-observer agreement for the length of tumor in the biopsy core measured in millimeters, evaluated on the core level ..... | 15 |
| Supplementary Figure S8. Intra-method inter-observer agreement for characteristics evaluated on the core level .....                                                                              | 16 |
| Supplementary Figure S9. Intra-method inter-observer agreement for characteristics evaluated on the slide level.....                                                                              | 17 |
| Supplementary Figure S10. Bland and Altman plot of the intra-method inter-observer agreement for the percentage of Gleason pattern 4, evaluated on the core level.....                            | 18 |

|                                                                                                                                                                                                     |    |
|-----------------------------------------------------------------------------------------------------------------------------------------------------------------------------------------------------|----|
| Supplementary Figure S11. Bland and Altman plot of the inter-method intra-observer agreement for the biopsy core length measured in millimeters, evaluated on the core level...                     | 19 |
| Supplementary Figure S12. Bland and Altman plot of the inter-method intra-observer agreement for the length of tumor in the biopsy core measured in millimeters, evaluated on the core level .....  | 20 |
| Supplementary Figure S13. Inter-method intra-observer agreement for characteristics evaluated on the core level .....                                                                               | 21 |
| Supplementary Figure S14. Inter-method intra-observer agreement for characteristics evaluated on the slide level .....                                                                              | 22 |
| Supplementary Figure S15. Bland and Altman plot of the inter-method intra-observer agreement for the percentage of Gleason pattern 4, evaluated on the core level .....                             | 23 |
| Supplementary Figure S16. Bland and Altman plot of the inter-method inter-observer agreement for the biopsy core length measured in millimeters, evaluated on the core level...                     | 24 |
| Supplementary Figure S17. Bland and Altman plot of the inter-method inter-observer agreement for the length of tumor in the biopsy core measured in millimeters, evaluated on the core level .....  | 25 |
| Supplementary Figure S18. Inter-method inter-observer agreement for characteristics evaluated on the core level .....                                                                               | 26 |
| Supplementary Figure S19. Inter-method inter-observer agreement for characteristics evaluated on the slide level .....                                                                              | 27 |
| Supplementary Figure S20. Bland and Altman plot of the inter-method inter-observer agreement for the percentage of Gleason pattern 4, evaluated on the core level .....                             | 28 |
| Supplementary Figure S21. Bland and Altman plot of the intra-method intra-observer agreement for the total biopsy length measured in millimeters, evaluated on the case level ..                    | 29 |
| Supplementary Figure S22. Bland and Altman plot of the intra-method intra-observer agreement for the total length of tumor in the biopsy measured in millimeters, evaluated on the case level ..... | 30 |
| Supplementary Figure S23. Intra-method intra-observer agreement evaluated on the case level .....                                                                                                   | 31 |
| Supplementary Figure S24. Bland and Altman plot of the intra-method inter-observer agreement for the total biopsy length measured in millimeters, evaluated on the case level ..                    | 32 |

|                                                                                                                                                                                                     |    |
|-----------------------------------------------------------------------------------------------------------------------------------------------------------------------------------------------------|----|
| Supplementary Figure S25. Bland and Altman plot of the intra-method inter-observer agreement for the total length of tumor in the biopsy measured in millimeters evaluated on the case level .....  | 33 |
| Supplementary Figure S26. Intra-method inter-observer agreement evaluated on the case level .....                                                                                                   | 34 |
| Supplementary Figure S27. Bland and Altman plot of the inter-method intra-observer agreement for the total biopsy length measured in millimeters, evaluated on the case level ..                    | 35 |
| Supplementary Figure S28. Bland and Altman plot of the inter-method intra-observer agreement for the total length of tumor in the biopsy measured in millimeters, evaluated on the case level ..... | 36 |
| Supplementary Figure S29. Inter-method intra-observer agreement evaluated on the case level .....                                                                                                   | 37 |
| Supplementary Figure S30. Bland and Altman plot of the inter-method inter-observer agreement for the total biopsy length measured in millimeters, evaluated on the case level ..                    | 38 |
| Supplementary Figure S31. Bland and Altman plot of the inter-method inter-observer agreement for the total length of tumor in the biopsy measured in millimeters, evaluated on the case level ..... | 39 |
| Supplementary Figure S32. Inter-method inter-observer agreement evaluated on the case level .....                                                                                                   | 40 |

## Supplementary methods

### The virtual microscopy system

The virtual microscopy system was developed by Centre for Advanced Studies, Research and Development in Sardinia (CRS4, [www.crs4.it](http://www.crs4.it)) and it comprises two integrated components (Figure 1):

1. ome\_seadragon ([https://github.com/crs4/ome\\_seadragon](https://github.com/crs4/ome_seadragon)), a plugin for the Open Microscopy Environment Remote Objects (OMERO) platform,<sup>1</sup> which enables viewing, handling and annotation of the 3DHitech images. The image management is based on the OMERO.server which supports over 140 different image formats and allows for storing of meta-information (e.g., classification TAGs or Regions of Interests (ROIs)). The ome\_seadragon simplifies the integration of the images stored within OMERO into external web systems,<sup>2</sup> adds Deep Zoom Image format (DZI) support to OMERO and, through OpenSlide libraries (<https://openslide.org>),<sup>3</sup> increases the number of supported image formats. The user side of ome\_seadragon is a specialized viewer based on the open source viewer OpenSeadragon (<https://openseadragon.github.io>). This viewer acts as a Virtual Microscope and can be easily embedded into external web services. Real time annotation tools which are based on Paper.js libraries (<http://paperjs.org>) enable navigation on a digital slide and annotation by drawing different 2D shapes, as well as taking precise measures (e.g., ROI length or area).
2. The ProMort Image Management System (<https://github.com/crs4/ProMort>), a web application developed by the CRS4 to manage the review worklist and clinical annotation process related to the ProMort study. The clinical annotation comprises two main steps: the definition of the ROIs and the clinical annotation of the ROIs. By embedding the ome\_seadragon viewer (i.e., the Virtual Microscope), the ProMort Image Management System allows users to navigate and annotate digital slides while creating new ROIs. Clinical annotations are performed via a dedicated user interface which has been designed specifically for ProMort.

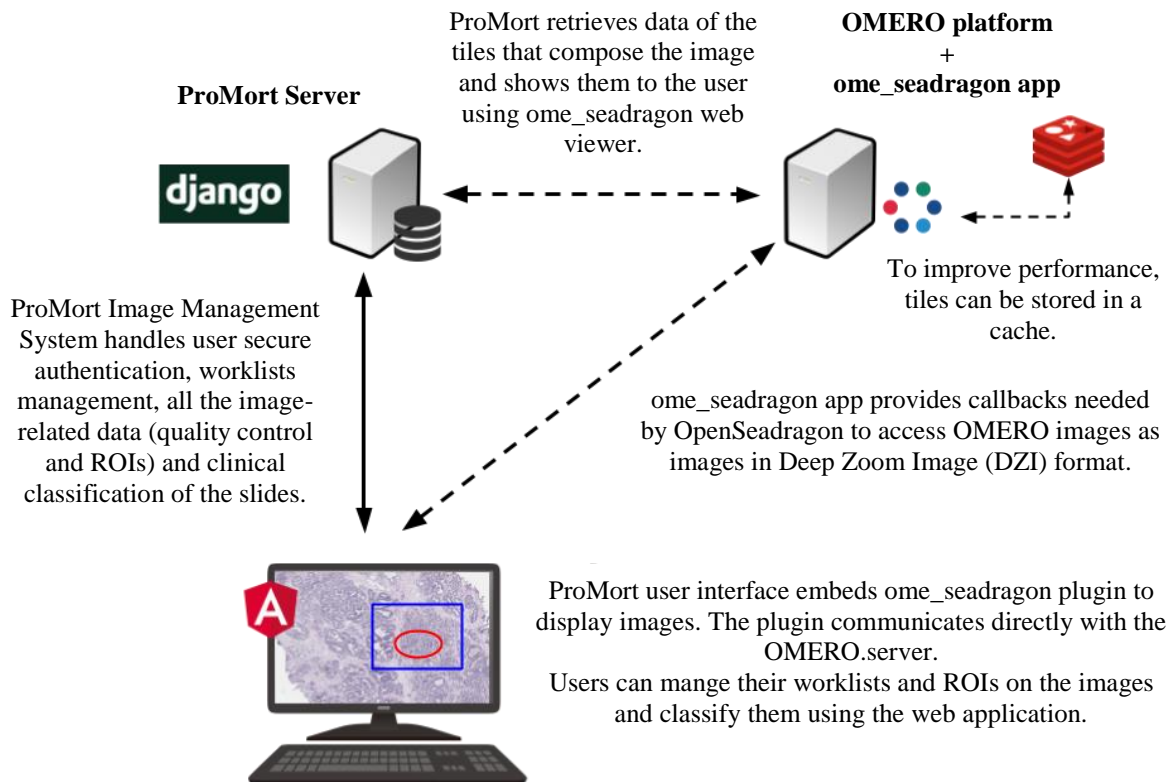

Figure 1. A simplified schematic representation of the virtual microscopy system

Abbreviations: OMERO, The Open Microscopy Environment Remote Objects; ROIs, Regions of interest

Notes: Histology slide image is a cropped version of the Cancer Genome Atlas (TCGA-PRAD) image which is freely available at [the Genomic Data Commons \(GDC\) portal](https://www.genomicdatacommons.org/) and is a part of the Open Access data tier (the dbGaP accession [phs000178.v11.p8](https://www.ncbi.nlm.nih.gov/geo/query/acc.cgi?acc=GSE101198)); Server icon – "Gorilla-server.svg", a server icon in the Gorilla icon theme style by George Boukeas licensed under [CC-BY-SA 3.0](https://creativecommons.org/licenses/by-sa/3.0/). Taken from [Wikimedia commons](https://commons.wikimedia.org/wiki/File:Gorilla-server.svg); Django logo – "Django logo" is a trademark of [Django Software Foundation](https://www.djangoproject.com/), licensed under [CC-BY-SA 3.0](https://creativecommons.org/licenses/by-sa/3.0/). Taken from [Django community](https://www.djangoproject.com/); Angular logo – "Angular logo" by the Angular team, licensed under [CC BY 4.0](https://creativecommons.org/licenses/by/4.0/). Taken from [Angular presskit](https://www.angularpresskit.com/); OMERO mark – "OME mark", by the [Open Microscopy Environment](https://www.openmicroscopy.org/), licensed under [CC BY 4.0](https://creativecommons.org/licenses/by/4.0/). Taken from [OME artwork](https://www.openmicroscopy.org/); Redis logo – "Redis logo"- is a trademark of [Redis Labs Ltd](https://redis.com/), licensed under [the 3-Clause BSD license](https://redis.com/legal/redis-3-clause-bsd-license/). Any rights therein are reserved to Redis Labs Ltd. Any use by CRS4 is for referential purposes only and does not indicate any sponsorship, endorsement or affiliation between Redis and CRS4

#### References:

- 1 Allan, C. *et al.* OMERO: flexible, model-driven data management for experimental biology. *Nat Methods* **9**, 245-253, doi:10.1038/nmeth.1896 (2012).
- 2 Lianas, L. *et al.* CyTest - An Innovative Open-source Platform for Training and Testing in Cytopathology. *Procd Soc Behv* **228**, 674-681, doi:10.1016/j.sbspro.2016.07.103 (2016).
- 3 Goode, A., Gilbert, B., Harkes, J., Jukic, D. & Satyanarayanan, M. OpenSlide: A vendor-neutral software foundation for digital pathology. *J Pathol Inform* **4**, 27, doi:10.4103/2153-3539.119005 (2013).

Supplementary Table S1. Histopathological characteristics evaluated on the slide level for 352 slides which were evaluated by both reviewers using both the light and virtual microscopy

|                                                       | Light microscopy |              |             | Virtual microscopy |              |             |
|-------------------------------------------------------|------------------|--------------|-------------|--------------------|--------------|-------------|
|                                                       | Reviewer 1.1     | Reviewer 1.2 | Reviewer 2  | Reviewer 1.1       | Reviewer 1.2 | Reviewer 2  |
|                                                       | N (%)            | N (%)        | N (%)       | N (%)              | N (%)        | N (%)       |
| <b>Acute inflammation</b>                             |                  |              |             |                    |              |             |
| No                                                    | 325 (92.33)      | 325 (92.33)  | 335 (95.17) | 324 (92.05)        | 322 (92.00)  | 335 (95.99) |
| Yes                                                   | 27 (7.67)        | 27 (7.67)    | 17 (4.83)   | 28 (7.95)          | 28 (8.00)    | 14 (4.01)   |
| Missing                                               | -                | -            | -           | -                  | 2            | 3           |
| <b>Chronic inflammation</b>                           |                  |              |             |                    |              |             |
| No                                                    | 215 (61.08)      | 218 (61.93)  | 247 (70.17) | 122 (34.66)        | 132 (37.71)  | 224 (64.18) |
| Yes                                                   | 137 (38.92)      | 134 (38.07)  | 105 (29.83) | 230 (65.34)        | 218 (62.29)  | 125 (35.82) |
| Missing                                               | -                | -            | -           | -                  | 2            | 3           |
| <b>High-grade prostatic intraepithelial neoplasia</b> |                  |              |             |                    |              |             |
| No                                                    | 329 (93.47)      | 336 (95.45)  | 335 (95.17) | 317 (90.06)        | 325 (92.86)  | 333 (95.42) |
| Yes                                                   | 23 (6.53)        | 16 (4.55)    | 17 (4.83)   | 35 (9.94)          | 25 (7.14)    | 16 (4.58)   |
| Missing                                               | -                | -            | -           | -                  | 2            | 3           |
| <b>Postatrophic hyperplasia</b>                       |                  |              |             |                    |              |             |
| No                                                    | 339 (96.31)      | 343 (97.44)  | 336 (95.45) | 337 (95.74)        | 339 (96.86)  | 339 (97.13) |
| Yes                                                   | 13 (3.69)        | 9 (2.56)     | 16 (4.55)   | 15 (4.26)          | 11 (3.14)    | 10 (2.87)   |
| Missing                                               | -                | -            | -           | -                  | 2            | 3           |
| <b>Periglandular inflammation</b>                     |                  |              |             |                    |              |             |
| No                                                    | 259 (73.58)      | 269 (76.42)  | 307 (87.22) | 199 (56.53)        | 211 (60.29)  | 273 (78.22) |
| Yes                                                   | 93 (26.42)       | 83 (23.58)   | 45 (12.78)  | 153 (43.47)        | 139 (39.71)  | 76 (21.78)  |
| Missing                                               | -                | -            | -           | -                  | 2            | 3           |
| <b>Intraglandular inflammation</b>                    |                  |              |             |                    |              |             |
| No                                                    | 322 (91.48)      | 321 (91.19)  | 335 (95.17) | 305 (86.65)        | 314 (89.71)  | 333 (95.42) |
| Yes                                                   | 30 (8.52)        | 31 (8.81)    | 17 (4.83)   | 47 (13.35)         | 36 (10.29)   | 16 (4.58)   |
| Missing                                               | -                | -            | -           | -                  | 2            | 3           |
| <b>Stromal inflammation</b>                           |                  |              |             |                    |              |             |
| No                                                    | 279 (79.26)      | 258 (73.30)  | 257 (73.01) | 187 (53.13)        | 207 (59.14)  | 258 (73.93) |
| Yes                                                   | 73 (20.74)       | 94 (26.70)   | 95 (26.99)  | 165 (46.88)        | 143 (40.86)  | 91 (26.07)  |

Abbreviations: N, Sample size; Reviewer 1.1, First review by Reviewer 1; Reviewer 1.2, Second review by Reviewer 1

Supplementary Table S2. Case-level summary of histopathological characteristics for 60 cases

|                                            | Light microscopy |               |               | Virtual microscopy |               |               |
|--------------------------------------------|------------------|---------------|---------------|--------------------|---------------|---------------|
|                                            | Reviewer 1.1     | Reviewer 1.2  | Reviewer 2    | Reviewer 1.1       | Reviewer 1.2  | Reviewer 2    |
|                                            | N (%)            | N (%)         | N (%)         | N (%)              | N (%)         | N (%)         |
| <b>Biopsy core length (mm)<sup>1</sup></b> |                  |               |               |                    |               |               |
| Mean (SD)                                  | 73.53 (26.10)    | 72.33 (25.04) | 72.45 (26.36) | 77.55 (25.47)      | 78.09 (26.33) | 75.11 (25.30) |
| <b>Positive core</b>                       |                  |               |               |                    |               |               |
| No                                         | 3 (5.00)         | 2 (3.33)      | 3 (5.00)      | 2 (3.33)           | 2 (3.33)      | 2 (3.33)      |
| Yes                                        | 57 (95.00)       | 58 (96.67)    | 57 (95.00)    | 58 (96.67)         | 58 (96.67)    | 58 (96.67)    |
| <b>Tumor length (mm)<sup>1</sup></b>       |                  |               |               |                    |               |               |
| Mean (SD)                                  | 34.49 (26.70)    | 32.38 (26.32) | 34.60 (27.10) | 30.35 (26.17)      | 30.95 (25.97) | 29.20 (26.85) |
| <b>Primary Gleason Grade</b>               |                  |               |               |                    |               |               |
| 3                                          | 16 (28.07)       | 17 (29.31)    | 15 (26.32)    | 16 (27.59)         | 16 (27.59)    | 18 (31.03)    |
| 4                                          | 34 (59.65)       | 40 (68.97)    | 32 (56.14)    | 37 (63.79)         | 36 (62.07)    | 37 (63.79)    |
| 5                                          | 7 (12.28)        | 1 (1.72)      | 10 (17.54)    | 5 (8.62)           | 6 (10.34)     | 3 (5.17)      |
| <b>Secondary Gleason grade</b>             |                  |               |               |                    |               |               |
| 3                                          | 12 (24.14)       | 14 (24.14)    | 12 (21.05)    | 15 (25.86)         | 12 (20.69)    | 15 (25.86)    |
| 4                                          | 28 (41.38)       | 24 (41.38)    | 29 (50.88)    | 28 (48.28)         | 28 (48.28)    | 25 (43.10)    |
| 5                                          | 17 (34.48)       | 20 (34.48)    | 16 (28.07)    | 15 (25.86)         | 18 (31.03)    | 18 (31.03)    |
| <b>Gleason score<sup>2</sup></b>           |                  |               |               |                    |               |               |
| 6                                          | 7 (12.28)        | 9 (15.52)     | 7 (12.28)     | 8 (13.79)          | 8 (13.79)     | 10 (17.24)    |
| 7                                          | 14 (24.56)       | 13 (22.41)    | 13 (22.81)    | 15 (25.86)         | 12 (20.69)    | 13 (22.41)    |
| 8                                          | 14 (24.56)       | 15 (25.86)    | 14 (24.56)    | 15 (25.86)         | 15 (20.69)    | 14 (24.14)    |
| 9                                          | 20 (35.09)       | 21 (36.21)    | 20 (35.09)    | 20 (34.48)         | 22 (37.93)    | 21 (36.21)    |
| 10                                         | 2 (3.51)         |               | 3 (5.26)      |                    | 1 (1.72)      |               |
| <b>Gleason Grade Groups<sup>3</sup></b>    |                  |               |               |                    |               |               |
| 1                                          | 7 (12.28)        | 9 (15.52)     | 7 (12.28)     | 8 (13.79)          | 8 (13.79)     | 10 (17.24)    |
| 2                                          | 9 (15.79)        | 8 (13.79)     | 8 (14.04)     | 8 (13.79)          | 8 (13.79)     | 18 (13.79)    |
| 3                                          | 5 (8.77)         | 5 (8.62)      | 5 (8.77)      | 7 (12.07)          | 4 (6.90)      | 5 (8.62)      |
| 4                                          | 14 (24.56)       | 15 (25.86)    | 14 (24.56)    | 15 (25.86)         | 15 (25.86)    | 14 (24.14)    |
| 5                                          | 22 (38.60)       | 21 (36.21)    | 23 (40.35)    | 20 (34.48)         | 23 (39.66)    | 21 (36.21)    |
| <b>Perineural invasion<sup>4</sup></b>     |                  |               |               |                    |               |               |
| No                                         | 35 (61.40)       | 40 (68.97)    | 36 (63.16)    | 40 (68.97)         | 39 (67.24)    | 39 (67.24)    |
| Yes                                        | 22 (38.60)       | 18 (31.03)    | 21 (36.84)    | 18 (31.03)         | 19 (32.76)    | 19 (32.76)    |

Abbreviations: N, Sample size; SD, Standard deviation; Reviewer 1.1, First review by Reviewer 1; Reviewer 1.2, Second review by Reviewer 1

<sup>1</sup> Sum of all the core level measurements per case

<sup>2</sup> The highest core-level Gleason score

<sup>3</sup> The highest Gleason core-level Grade Group

<sup>4</sup> Perineural invasion present on at least one core for one case



Supplementary Table S3. Reasons for exclusion of diagnostic slides

| Rejection reason       | Light microscopy |              |            | Virtual microscopy |              |            |
|------------------------|------------------|--------------|------------|--------------------|--------------|------------|
|                        | Reviewer 1.1     | Reviewer 1.2 | Reviewer 2 | Reviewer 1.1       | Reviewer 1.2 | Reviewer 2 |
|                        | N=362            | N=362        | N=362      | N=417              | N=417        | N=417      |
|                        | N (%)            | N (%)        | N (%)      | N (%)              | N (%)        | N (%)      |
| Technically inadequate | -                | -            | -          | 2 (0.48)           | 1 (0.24)     | 2 (0.24)   |
| No prostate tissue     | 4 (1.10)         | 6 (1.66)     | 5 (1.38)   | 5 (1.20)           | 5 (1.20)     | 6 (1.20)   |
| No tissue              | 3 (0.83)         | -            | 2 (0.55)   | 1 (0.24)           | 1 (0.24)     | 1 (0.24)   |
| Duplicate slide        | -                | -            | -          | 54 (12.95)         | 55 (12.95)   | 54 (12.47) |

Abbreviations: N, Sample size; Reviewer 1.1, First review by Reviewer 1; Reviewer 1.2, Second review by Reviewer 1

Supplementary Figure S1. Bland and Altman plot of the intra-method intra-observer agreement for biopsy core length measured in millimeters, evaluated on the core level

Abbreviations: Light 1.1, First review by Reviewer 1 on light microscopy; Light 1.2, Second review by Reviewer 1 on light microscopy; Virtual 1.1, First review by Reviewer 1 on virtual microscopy; Virtual 1.2, Second review by Reviewer 1 on virtual microscopy

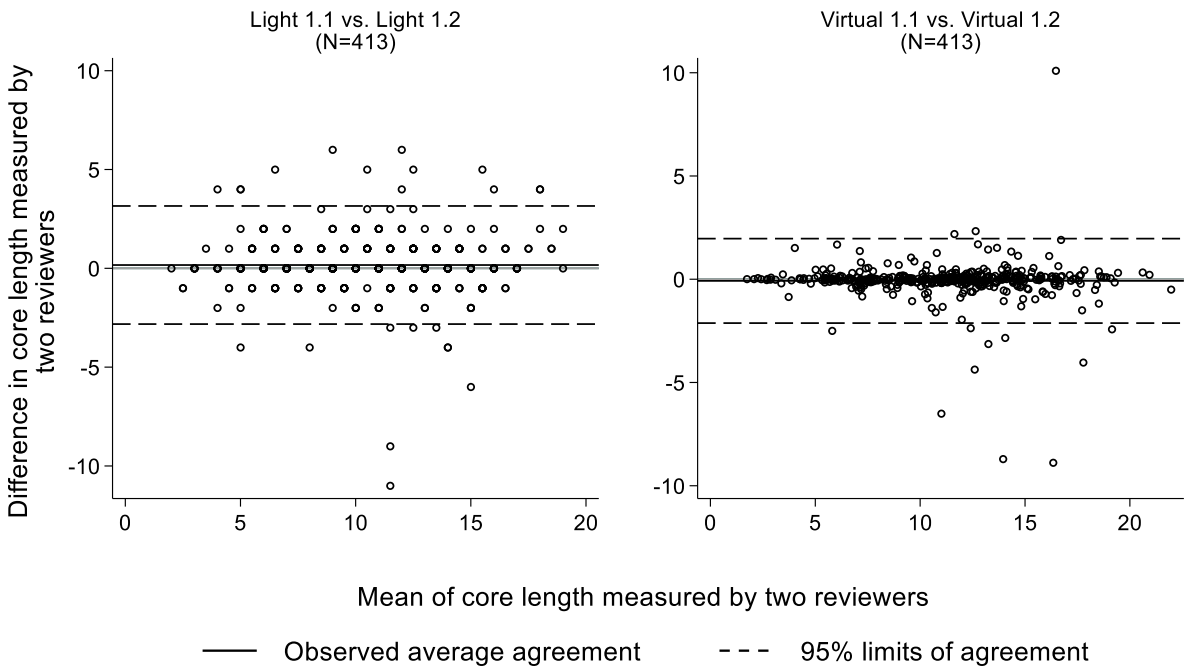

Supplementary Figure S2. Bland and Altman plot of the intra-method intra-observer agreement for length of tumor in the biopsy core measured in millimeters, evaluated on the core level

Abbreviations: Light 1.1, First review by Reviewer 1 on light microscopy; Light 1.2, Second review by Reviewer 1 on light microscopy; Virtual 1.1, First review by Reviewer 1 on virtual microscopy; Virtual 1.2, Second review by Reviewer 1 on virtual microscopy

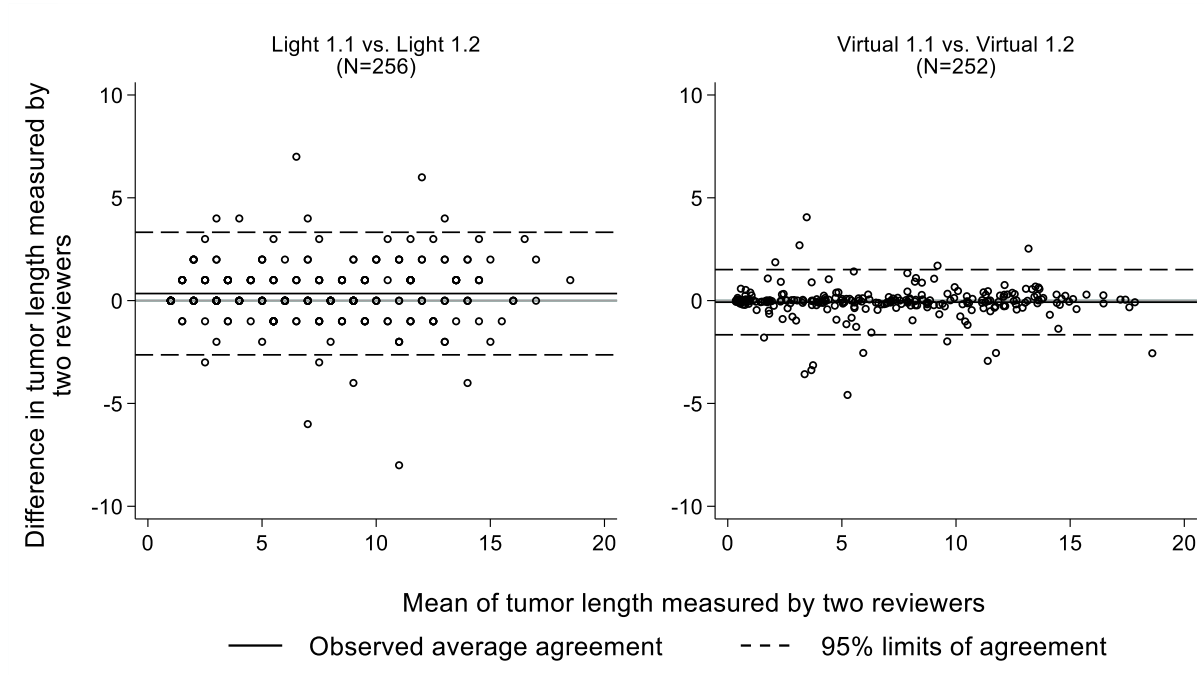

Supplementary Figure S3. Intra-method intra-observer agreement for characteristics evaluated on the core level

Abbreviations: Light 1.1, First review by Reviewer 1 on light microscopy; Light 1.2, Second review by Reviewer 1 on light microscopy; Virtual 1.1, First review by Reviewer 1 on virtual microscopy; Virtual 1.2, Second review by Reviewer 1 on virtual microscopy

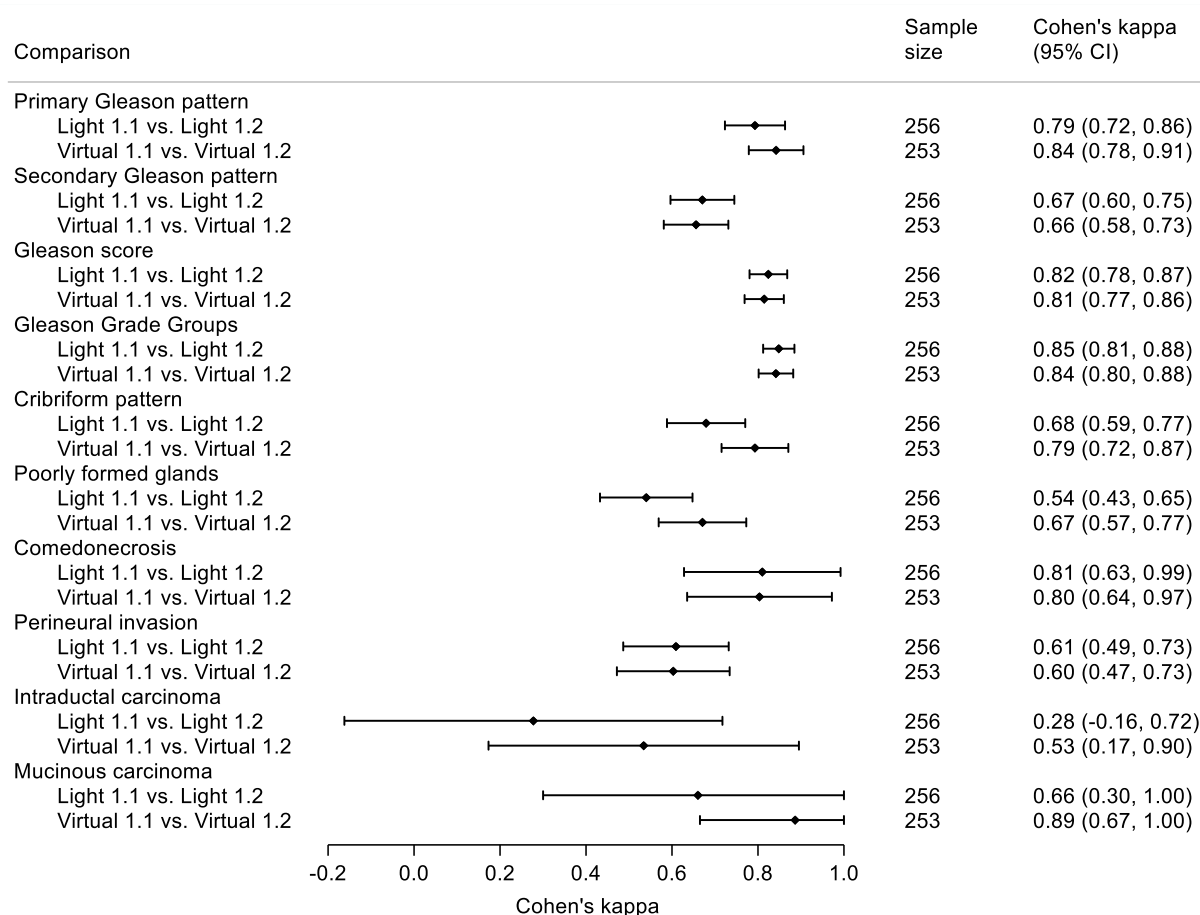

Supplementary Figure S4. Intra-method intra-observer agreement for characteristics evaluated on the slide level

Abbreviations: Light 1.1, First review by Reviewer 1 on light microscopy; Light 1.2, Second review by Reviewer 1 on light microscopy; Virtual 1.1, First review by Reviewer 1 on virtual microscopy; Virtual 1.2, Second review by Reviewer 1 on virtual microscopy

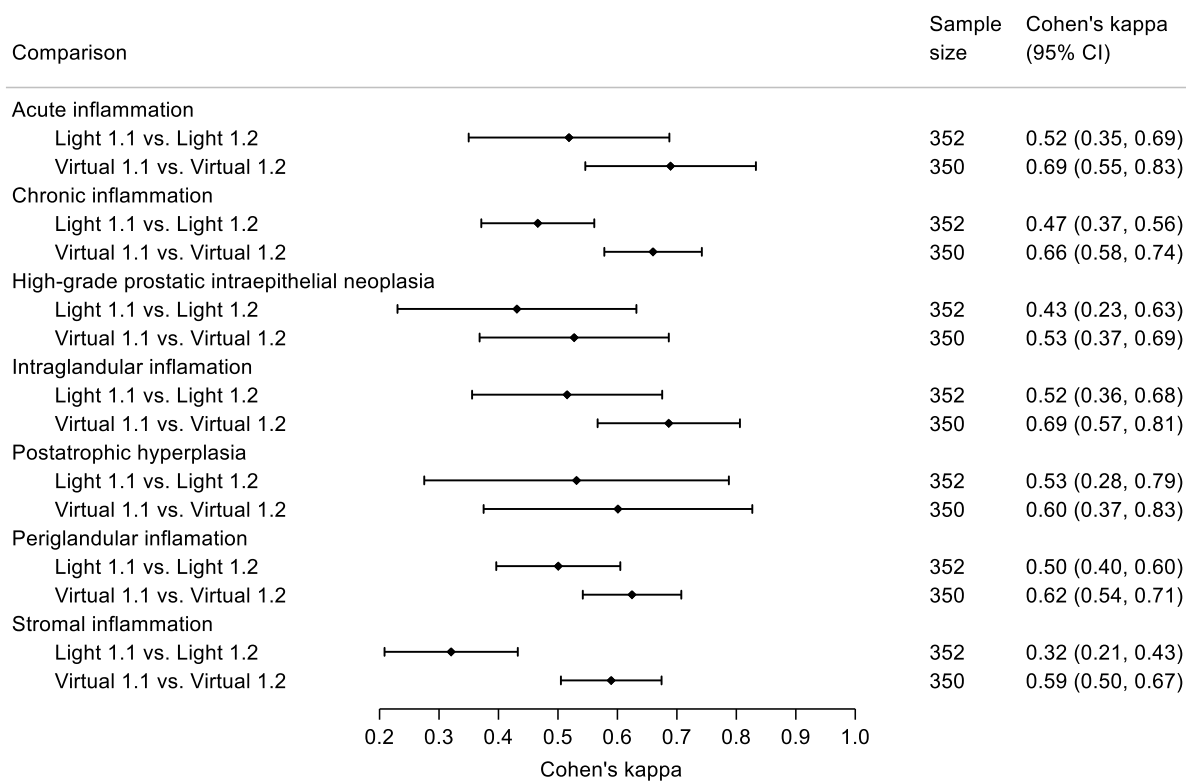

Supplementary Figure S5. Bland and Altman plot of the intra-method intra-observer agreement for the percentage of Gleason pattern 4, evaluated on the core level

Abbreviations: Light 1.1, First review by Reviewer 1 on light microscopy; Light 1.2, Second review by Reviewer 1 on light microscopy; Virtual 1.1, First review by Reviewer 1 on virtual microscopy; Virtual 1.2, Second review by Reviewer 1 on virtual microscopy

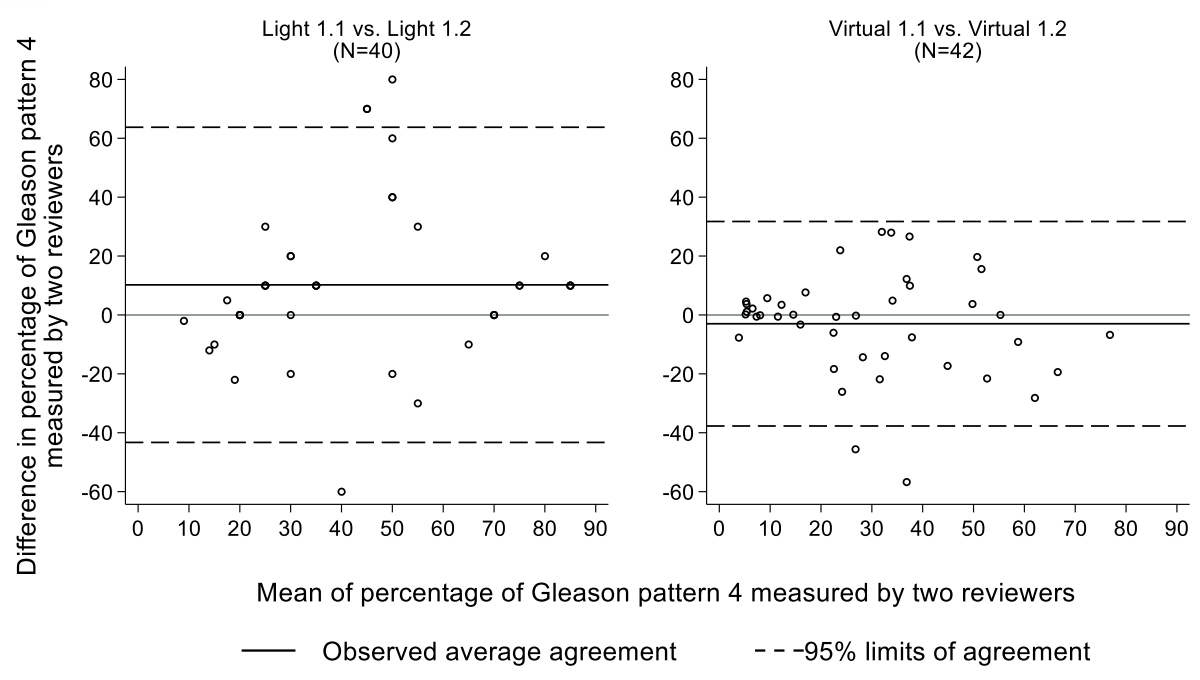

Supplementary Figure S6. Bland and Altman plot of the intra-method inter-observer agreement for biopsy core length measured in millimeters, evaluated on the core level

Abbreviations: Light1.1, First review by Reviewer 1 on light microscopy; Light 2, Reviewer 2 on light microscopy; Light 1.2, Second review by Reviewer 1 on light microscopy; Virtual 1.1, First review by Reviewer 1 on virtual microscopy; Virtual 2, Reviewer 2 on virtual microscopy; Virtual 1.2, Second review by Reviewer 1 on virtual microscopy

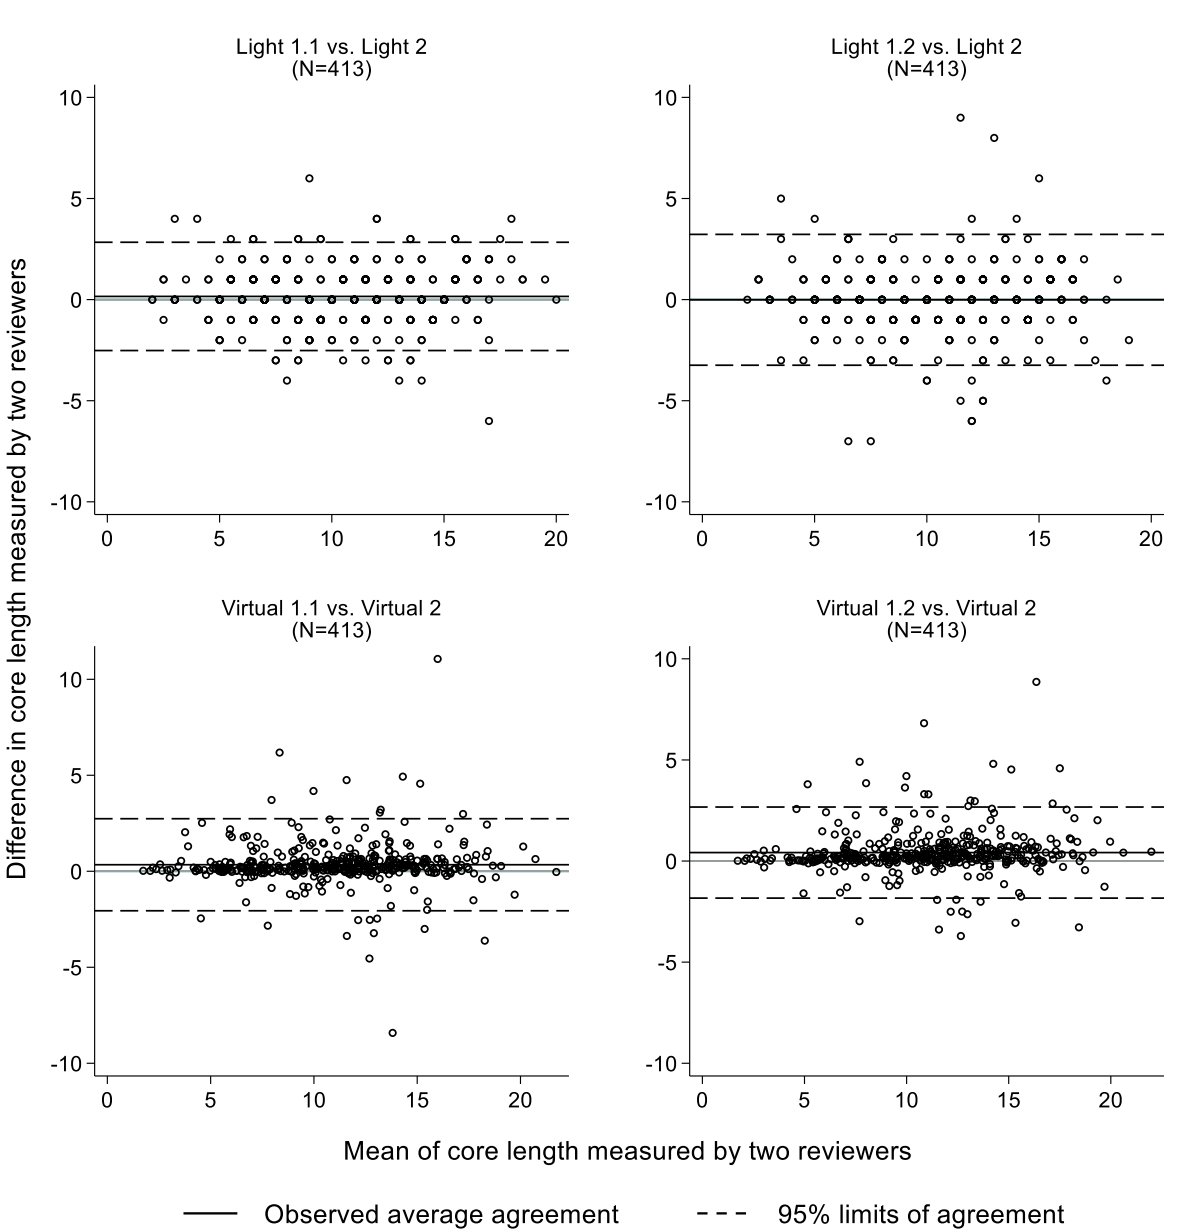

Supplementary Figure S7. Bland and Altman plot of the intra-method inter-observer agreement for the length of tumor in the biopsy core measured in millimeters, evaluated on the core level

Abbreviations: Light 1.1, First review by Reviewer 1 on light microscopy; Light 2, Reviewer 2 on light microscopy; Light 1.2, Second review by Reviewer 1 on light microscopy; Virtual 1.1, First review by Reviewer 1 on virtual microscopy; Virtual 2, Reviewer 2 on virtual microscopy; Virtual 1.2, Second review by Reviewer 1 on virtual microscopy

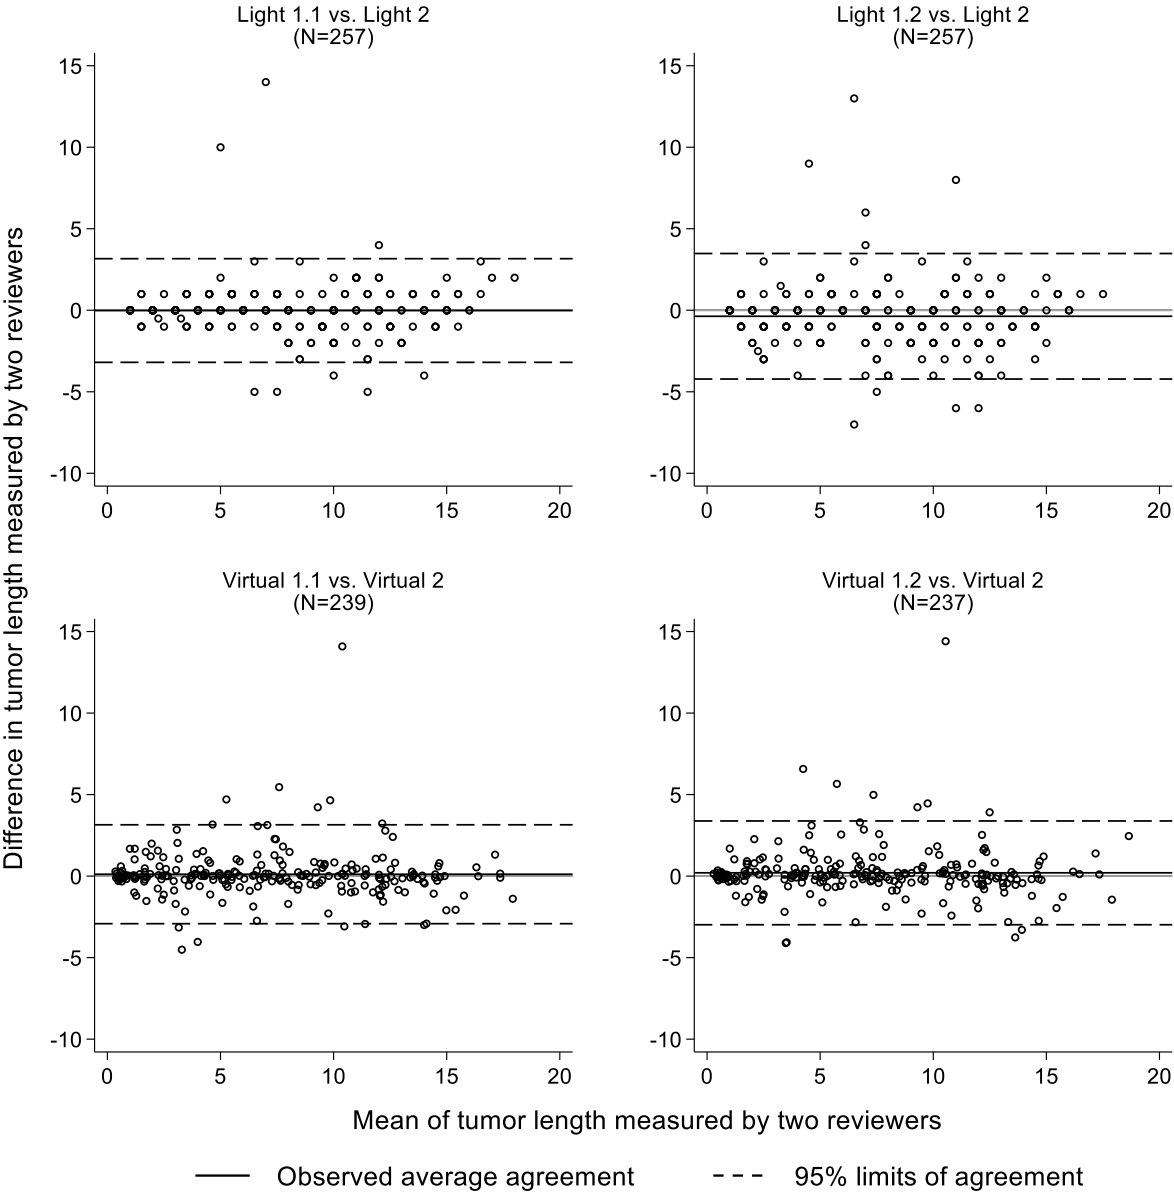



Supplementary Figure S8. Intra-method inter-observer agreement for characteristics evaluated on the core level

Abbreviations: Light 1.1, First review by Reviewer 1 on light microscopy; Light 2, Reviewer 2 on light microscopy; Light 1.2, Second review by Reviewer 1 on light microscopy; Virtual 1.1, First review by Reviewer 1 on virtual microscopy; Virtual 2, Reviewer 2 on virtual microscopy; Virtual 1.2, Second review by Reviewer 1 on virtual microscopy;

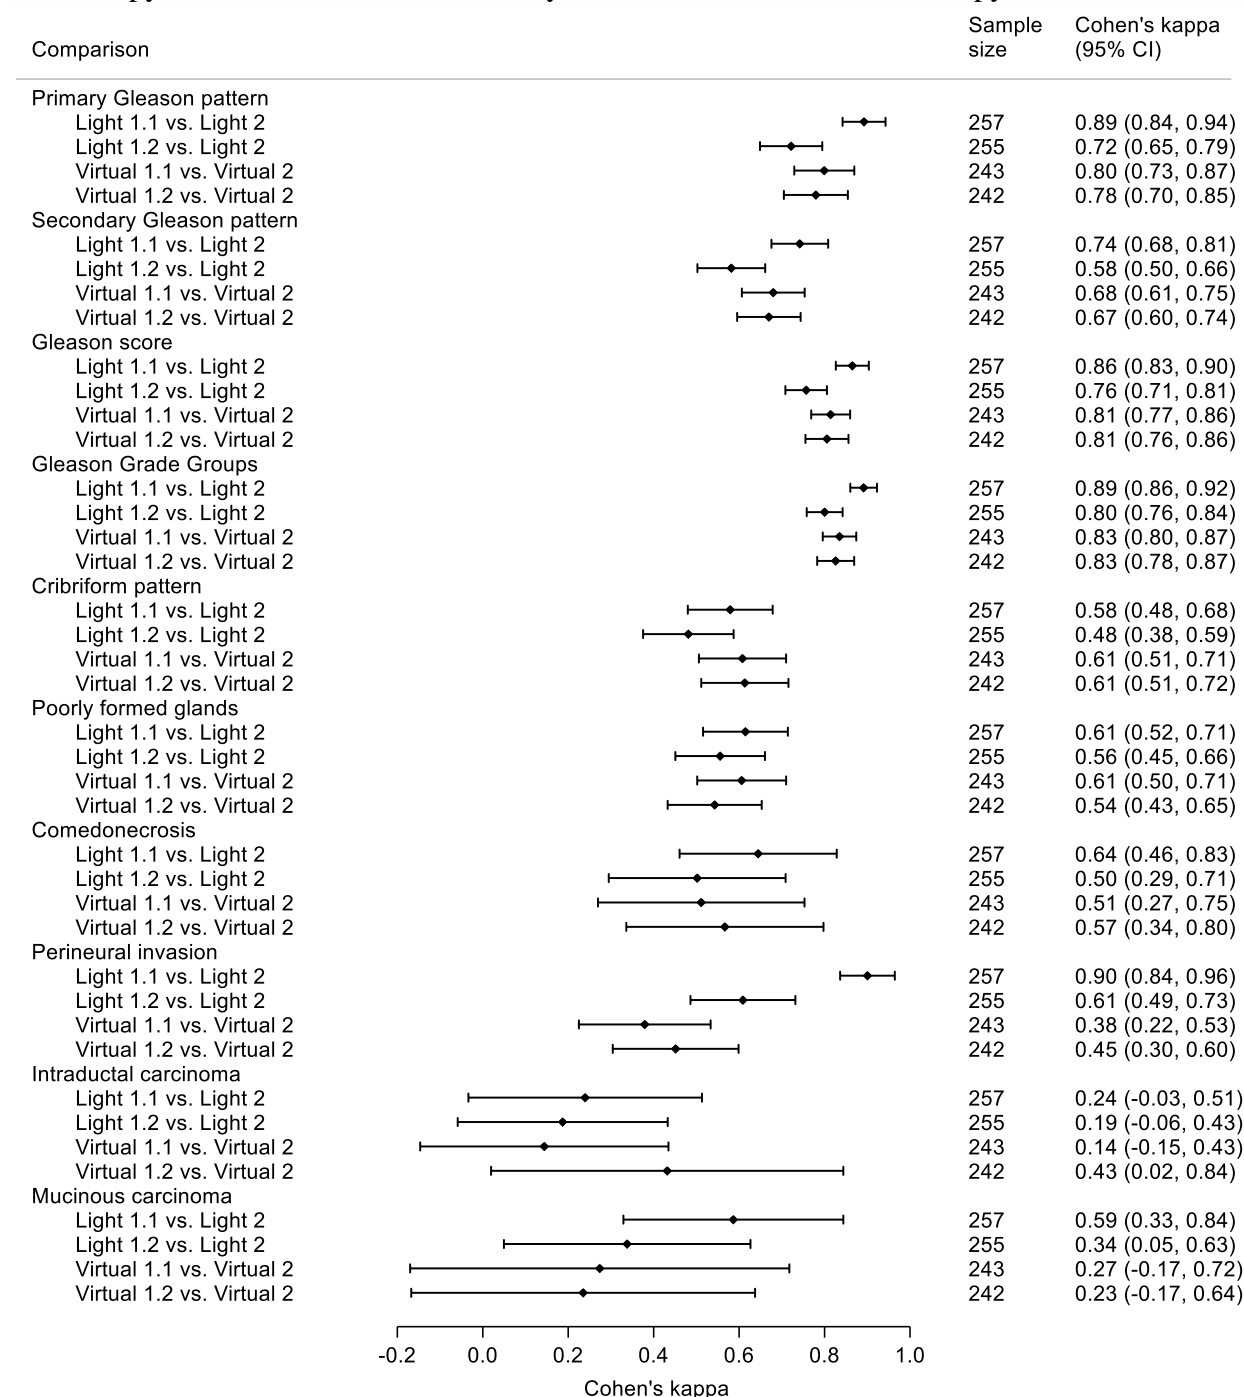

Supplementary Figure S9. Intra-method inter-observer agreement for characteristics evaluated on the slide level

Abbreviations: Light 1.1, First review by Reviewer 1 on light microscopy; Light 2, Reviewer 2 on light microscopy; Light 1.2, Second review by Reviewer 1 on light microscopy; Virtual 1.1, First review by Reviewer 1 on virtual microscopy; Virtual 2, Reviewer 2 on virtual microscopy; Virtual 1.2, Second review by Reviewer 1 on virtual microscopy;

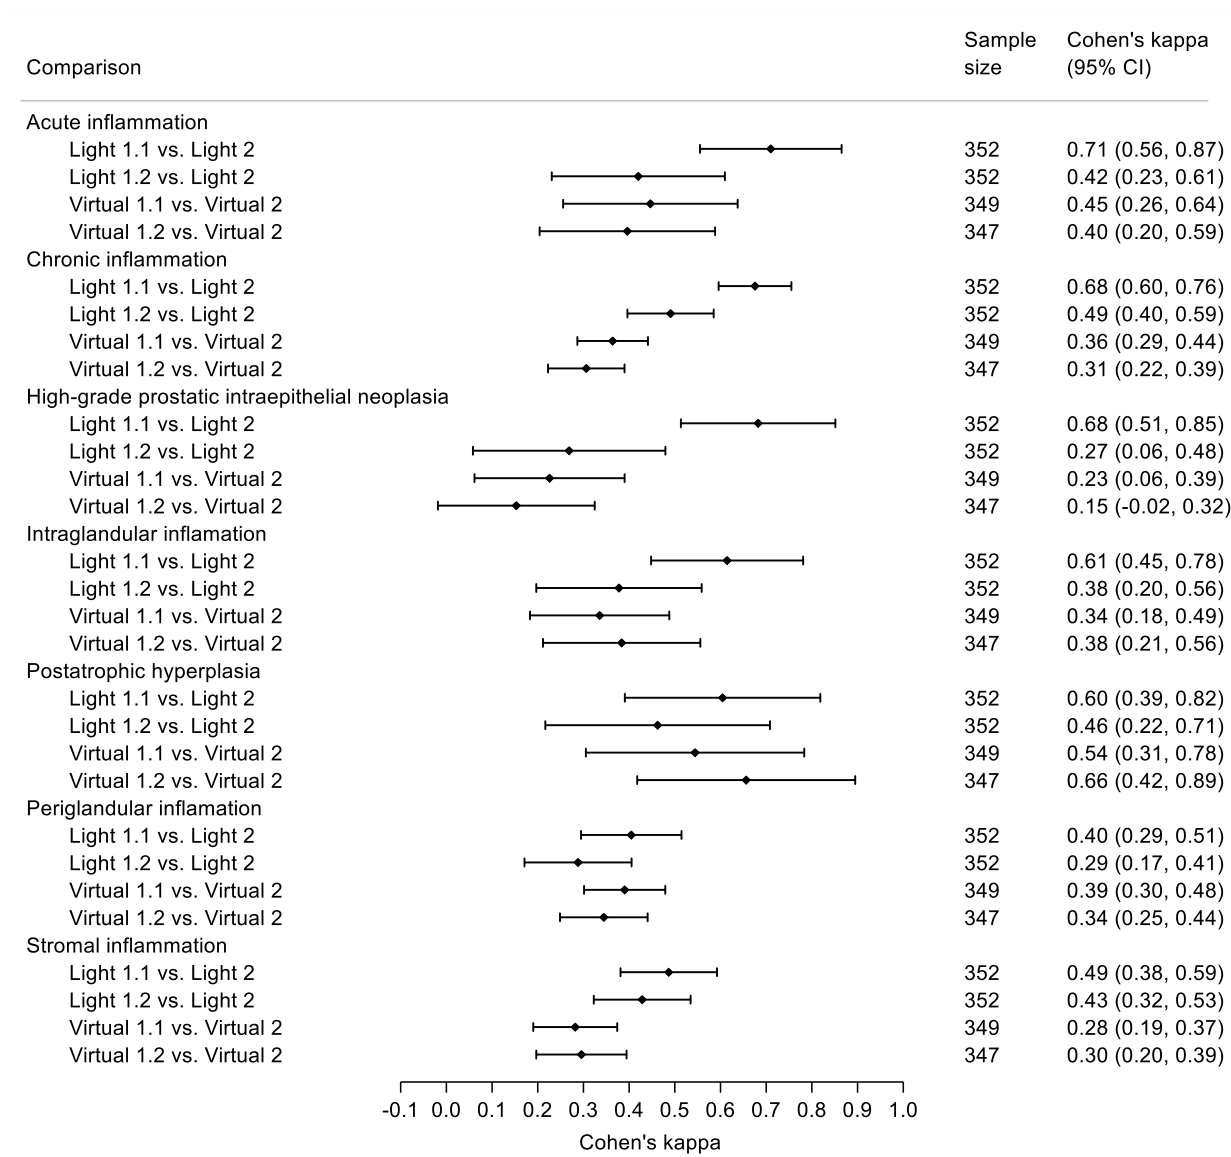

Supplementary Figure S10. Bland and Altman plot of the intra-method inter-observer agreement for the percentage of Gleason pattern 4, evaluated on the core level

Abbreviations: Light 1.1, First review by Reviewer 1 on light microscopy; Light 2, Reviewer 2 on light microscopy; Light 1.2, Second review by Reviewer 1 on light microscopy; Virtual 1.1, First review by Reviewer 1 on virtual microscopy; Virtual 2, Reviewer 2 on virtual microscopy; Virtual 1.2, Second review by Reviewer 1 on virtual microscopy

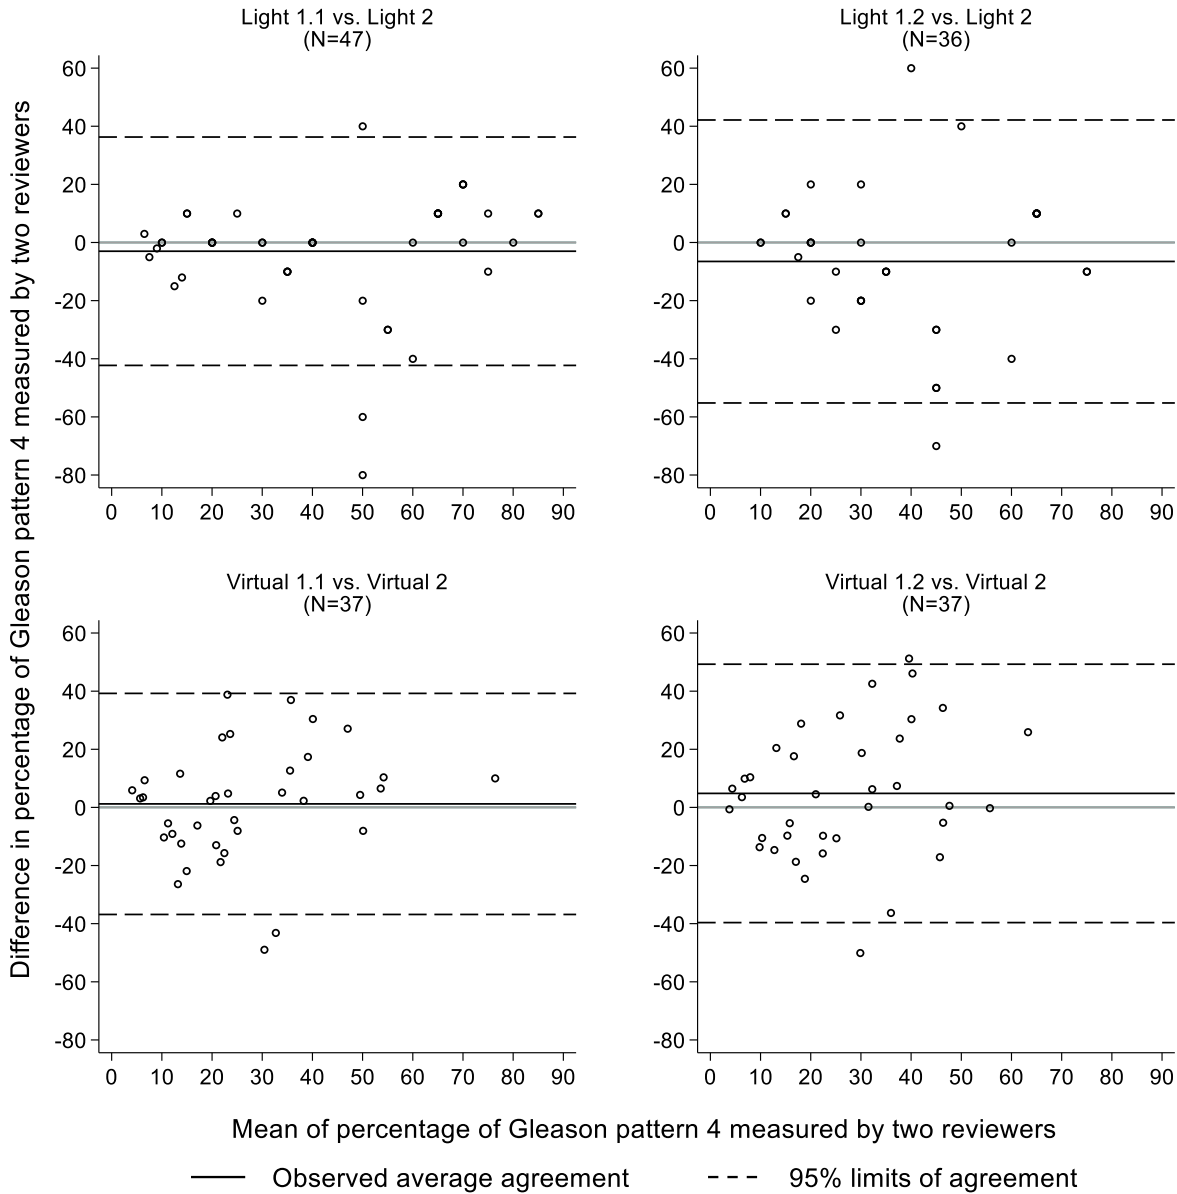

Supplementary Figure S11. Bland and Altman plot of the inter-method intra-observer agreement for the biopsy core length measured in millimeters, evaluated on the core level

Abbreviations: Light 1.1, First review by Reviewer 1 on light microscopy; Virtual 1.1, First review by Reviewer 1 on virtual microscopy; Virtual 1.2, Second review by Reviewer 1 on virtual microscopy; Light 2, Reviewer 2 on light microscopy; Virtual 2, Reviewer 2 on virtual microscopy; Light 1.2, Second review by Reviewer 1 on light microscopy

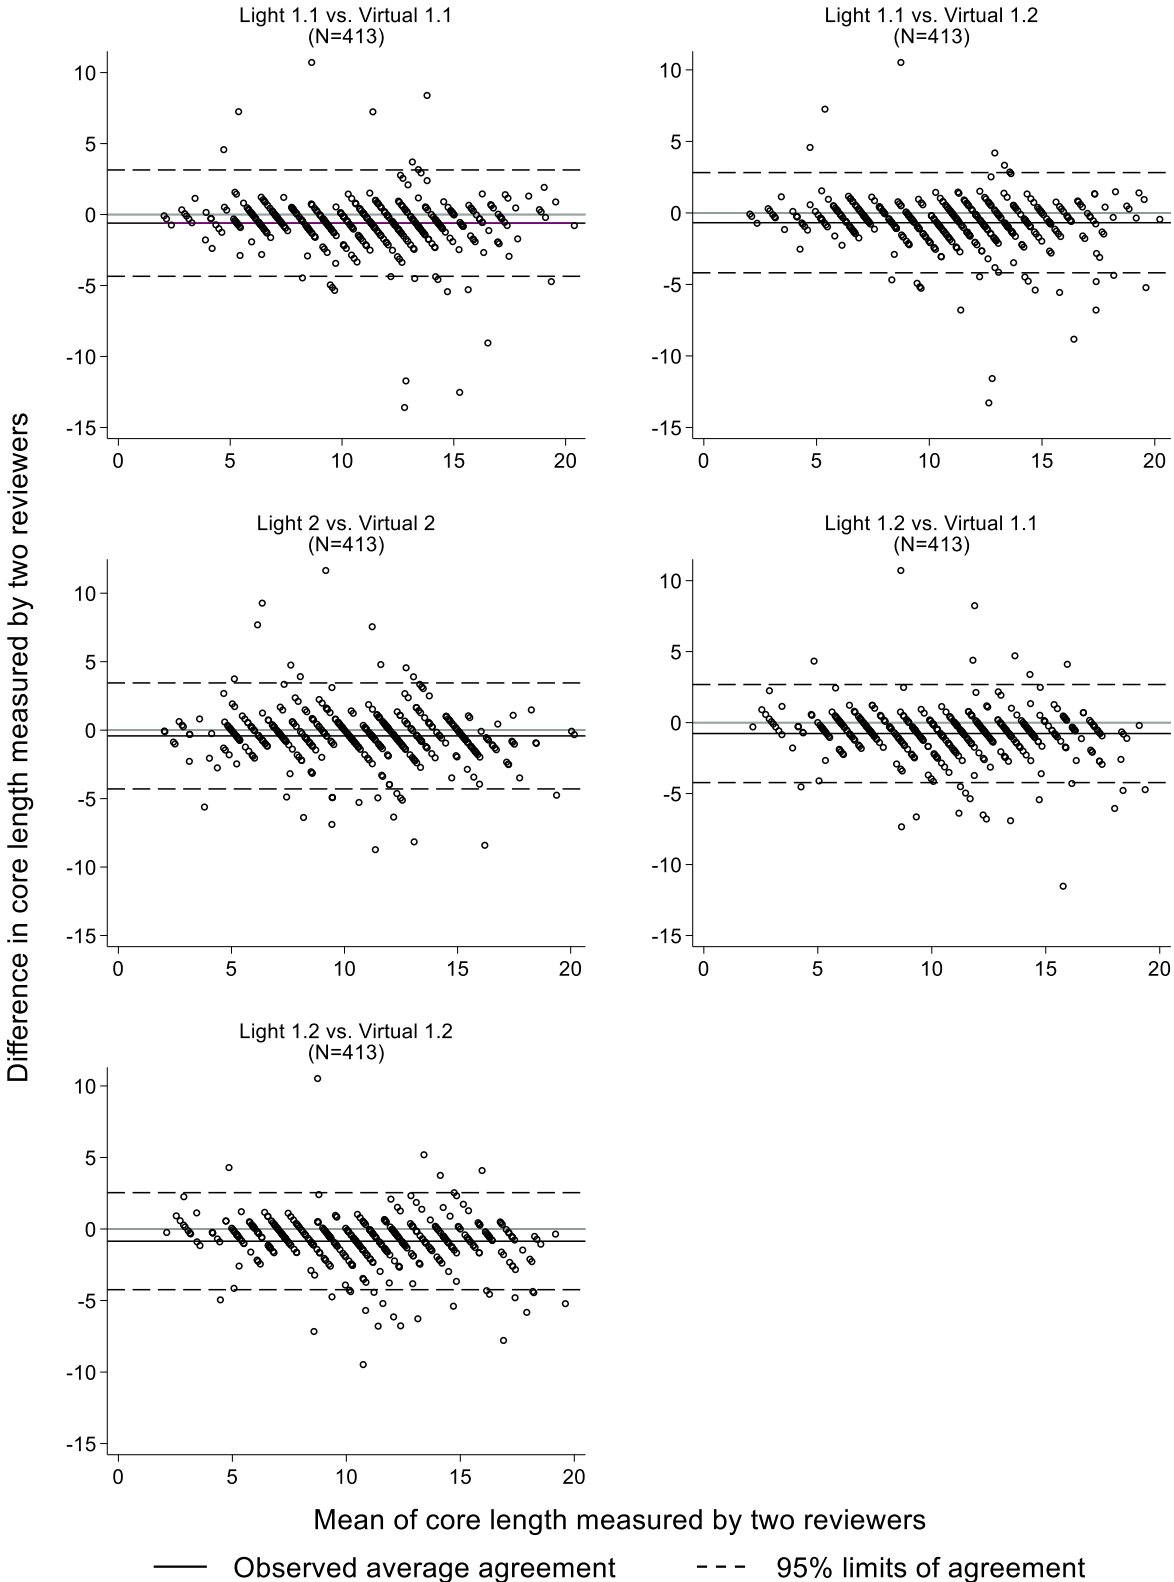

Supplementary Figure S12. Bland and Altman plot of the inter-method intra-observer agreement for the length of tumor in the biopsy core measured in millimeters, evaluated on the core level

Abbreviations: Light 1.1, First review by Reviewer 1 on light microscopy; Virtual 1.1, First review by Reviewer 1 on virtual microscopy; Virtual 1.2, Second review by Reviewer 1 on virtual microscopy; Light 2, Reviewer 2 on light microscopy; Virtual 2, Reviewer 2 on virtual microscopy; Light 1.2, Second review by Reviewer 1 on light microscopy

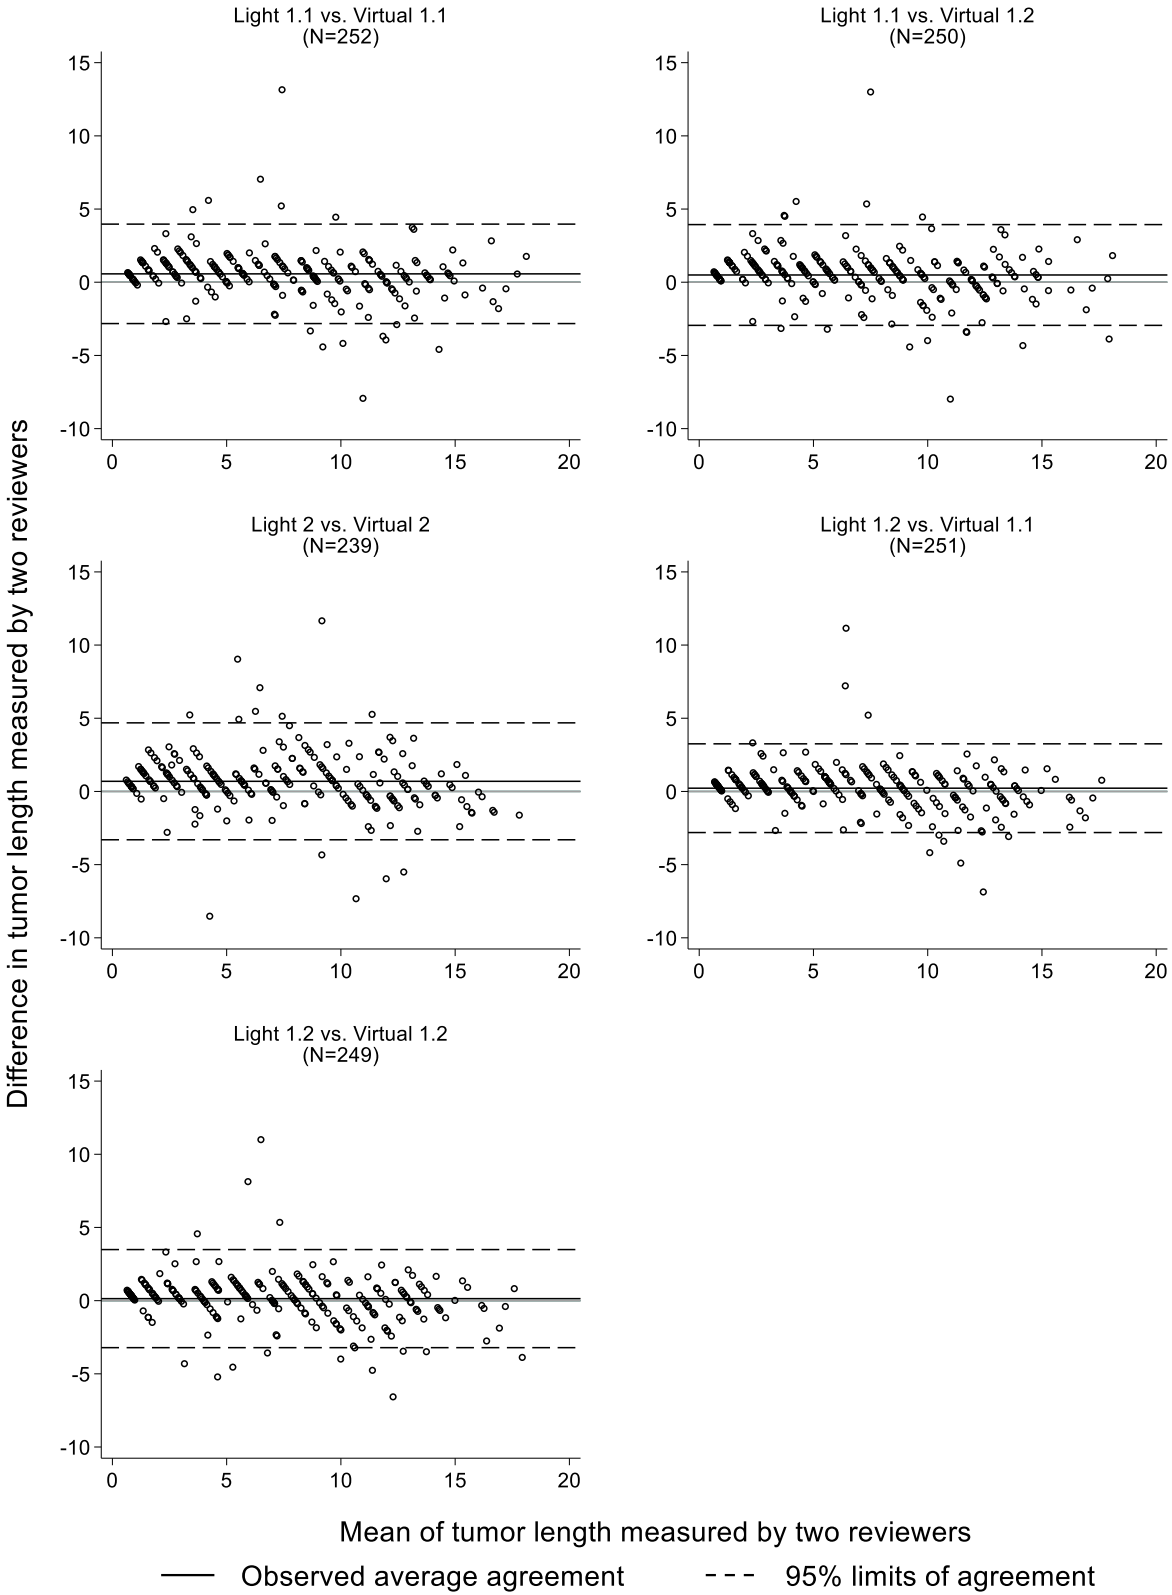

Supplementary Figure S13. Inter-method intra-observer agreement for characteristics evaluated on the core level

Abbreviations: Light 1.1, First review by Reviewer 1 on light microscopy; Virtual 1.1, First review by Reviewer 1 on virtual microscopy; Virtual 1.2, Second review by Reviewer 1 on virtual microscopy; Light 2, Reviewer 2 on light microscopy; Virtual 2, Reviewer 2 on virtual microscopy; Light 1.2, Second review by Reviewer 1 on light microscopy

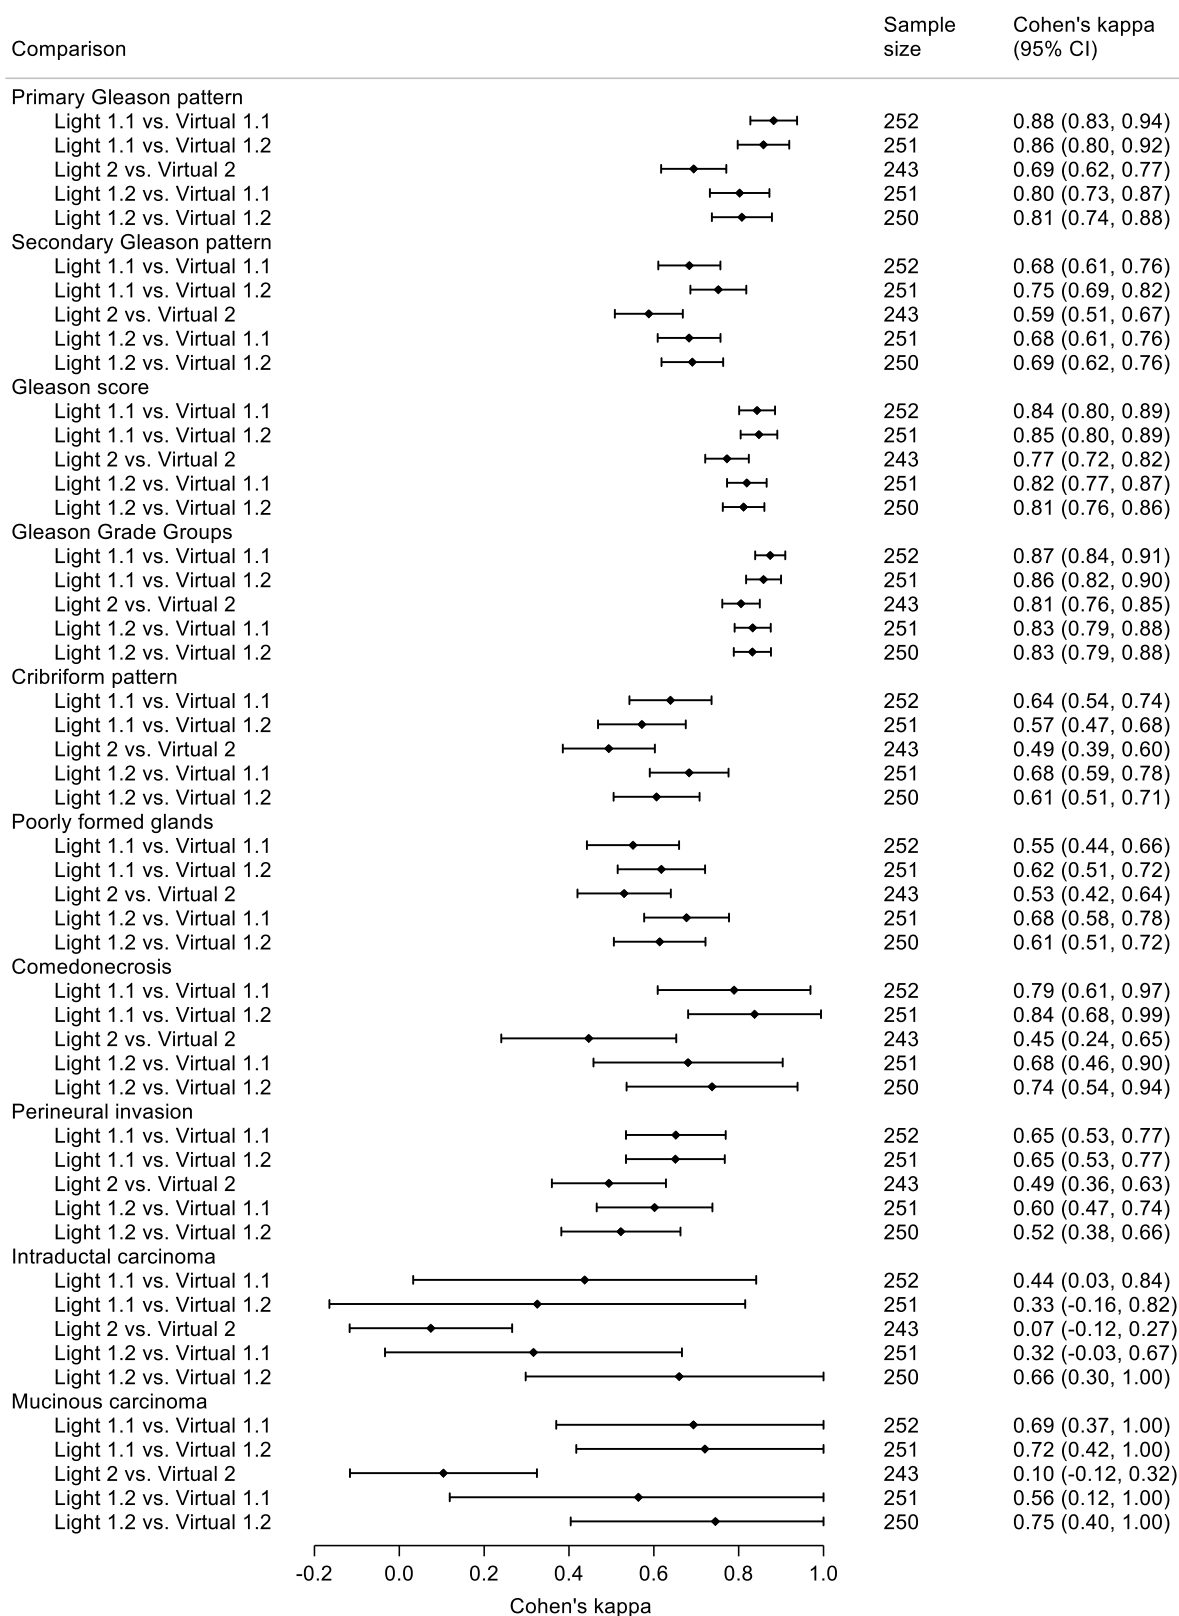

Supplementary Figure S14. Inter-method intra-observer agreement for characteristics evaluated on the slide level

Abbreviations: Light 1.1, First review by Reviewer 1 on light microscopy; Virtual 1.1, First review by Reviewer 1 on virtual microscopy; Virtual 1.2, Second review by Reviewer 1 on virtual microscopy; Light 2, Reviewer 2 on light microscopy; Virtual 2, Reviewer 2 on virtual microscopy; Light 1.2, Second review by Reviewer 1 on light microscopy

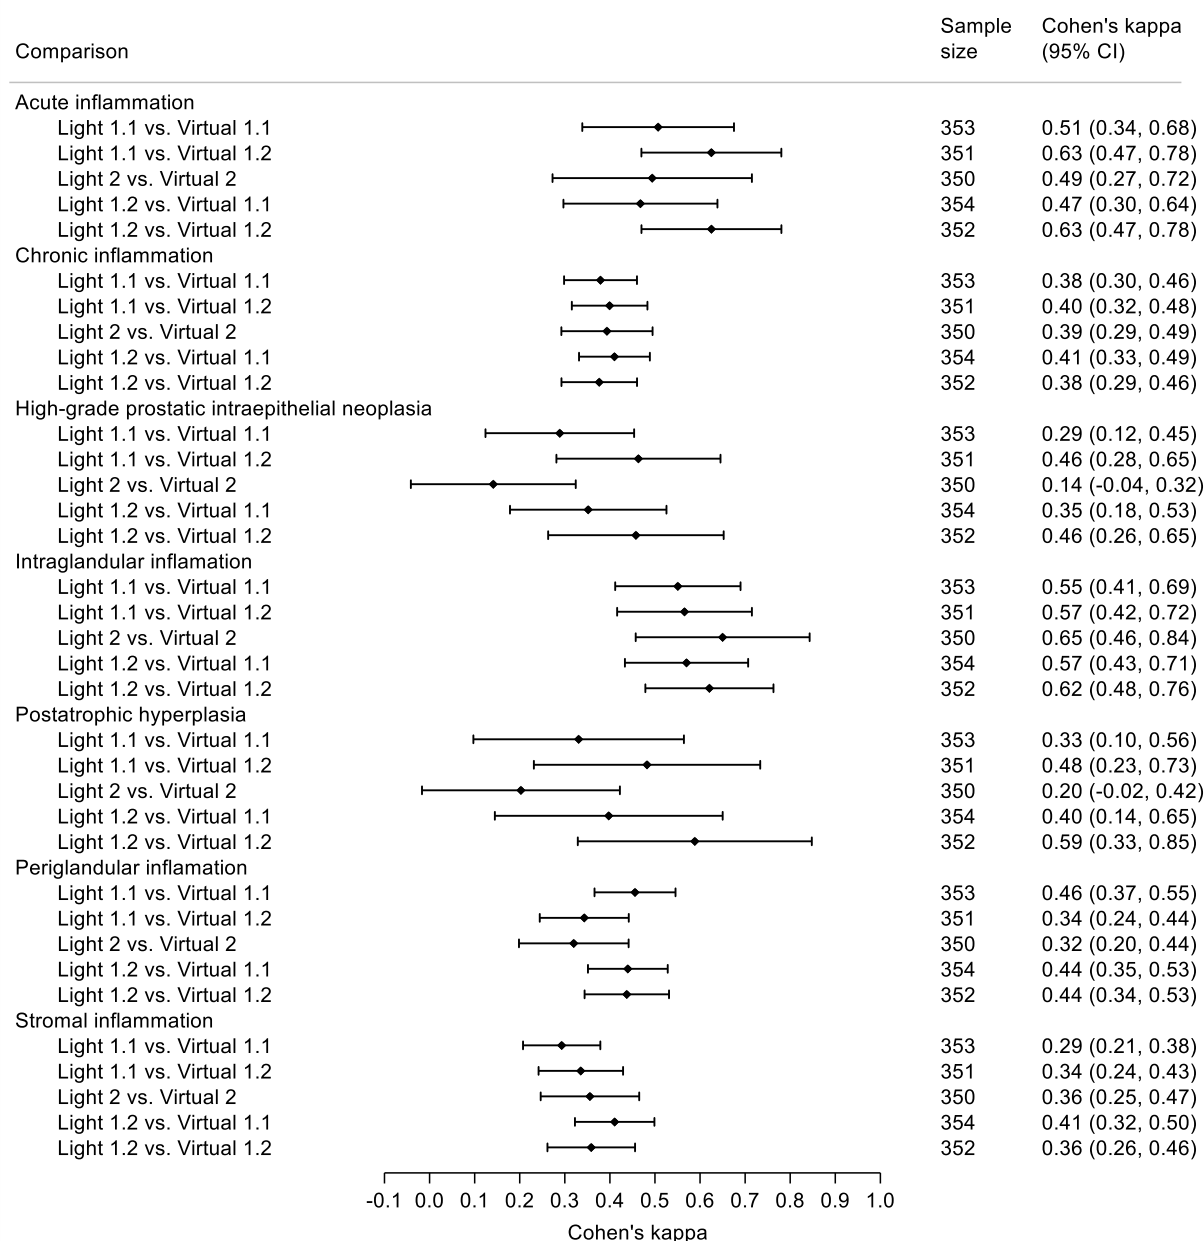

Supplementary Figure S15. Bland and Altman plot of the inter-method intra-observer agreement for the percentage of Gleason pattern 4, evaluated on the core level

Abbreviations: Light 1.1, First review by Reviewer 1 on light microscopy; Virtual 1.1, First review by Reviewer 1 on virtual microscopy; Virtual 1.2, Second review by Reviewer 1 on virtual microscopy; Light 2, Reviewer 2 on light microscopy; Virtual 2, Reviewer 2 on virtual microscopy; Light 1.2, Second review by Reviewer 1 on light microscopy

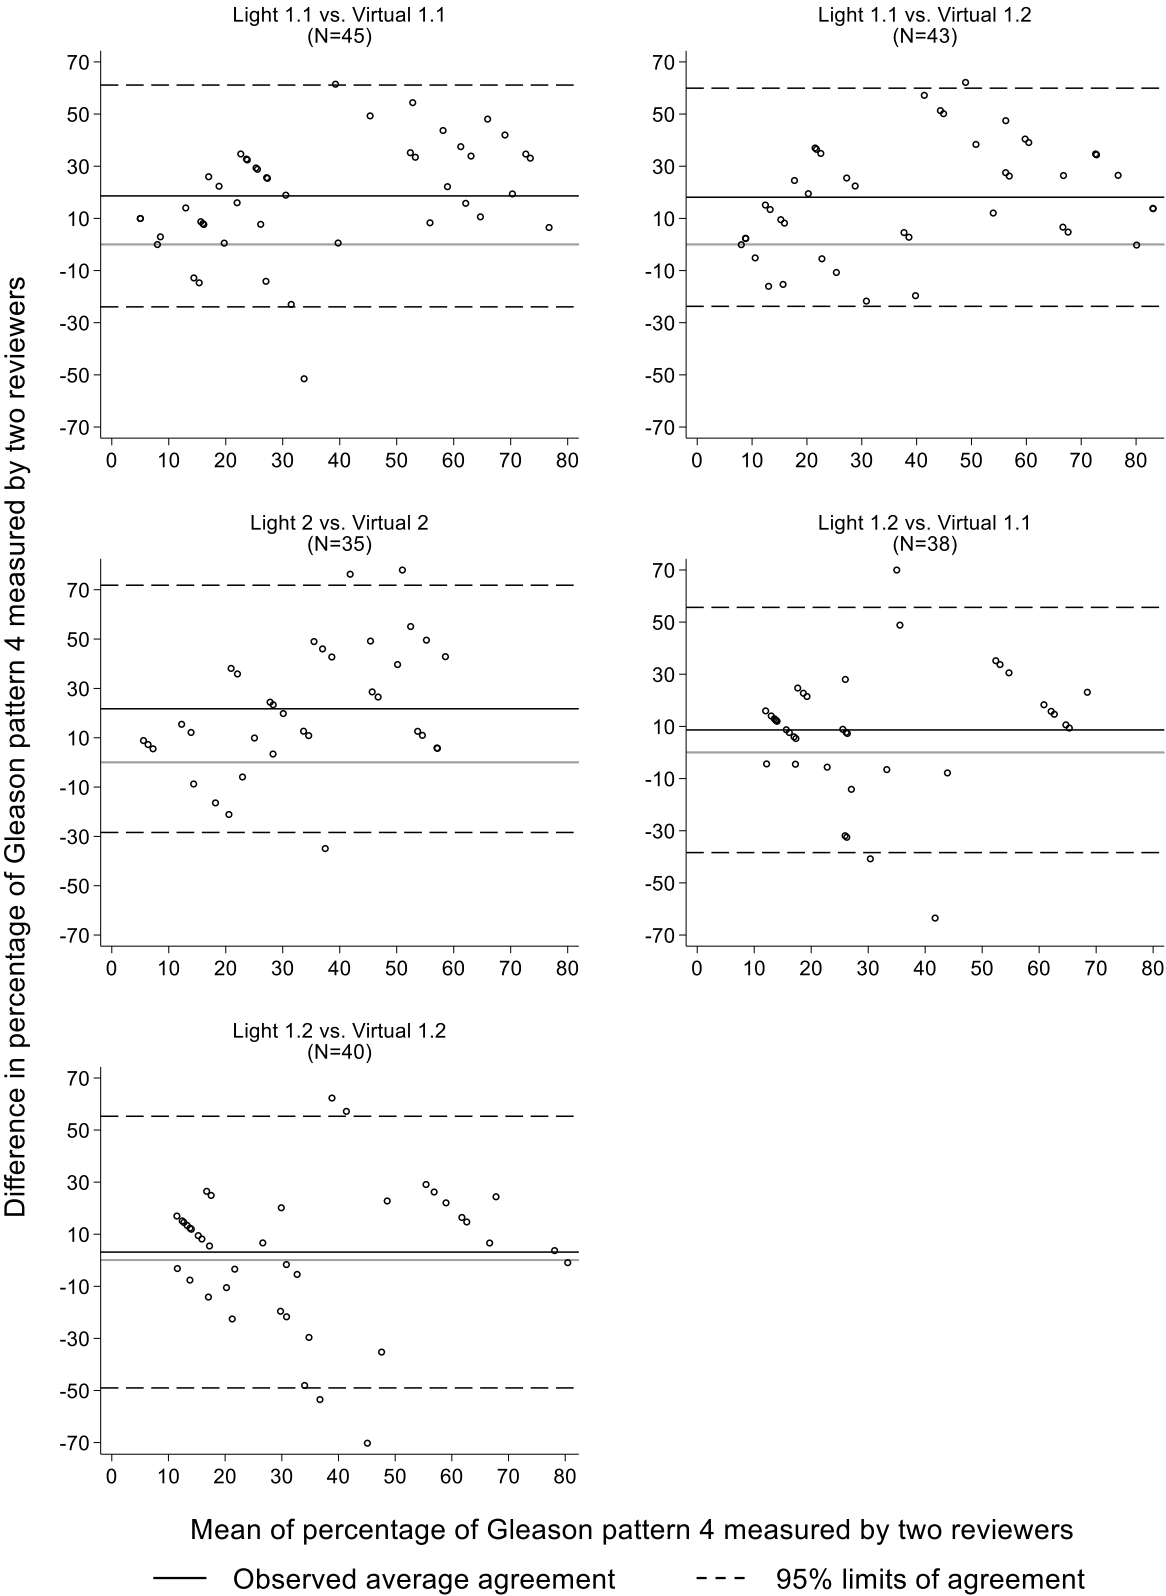



Supplementary Figure S16. Bland and Altman plot of the inter-method inter-observer agreement for the biopsy core length measured in millimeters, evaluated on the core level

Abbreviations: Light 1.1, First review by Reviewer 1 on light microscopy; Virtual 2, Reviewer 2 on virtual microscopy; Light 2, Reviewer 2 on light microscopy; Virtual 1.1, First review by Reviewer 1 on virtual microscopy; Virtual 1.2, Second review by Reviewer 1 on virtual microscopy; Light 1.2, Second review by Reviewer 1 on light microscopy

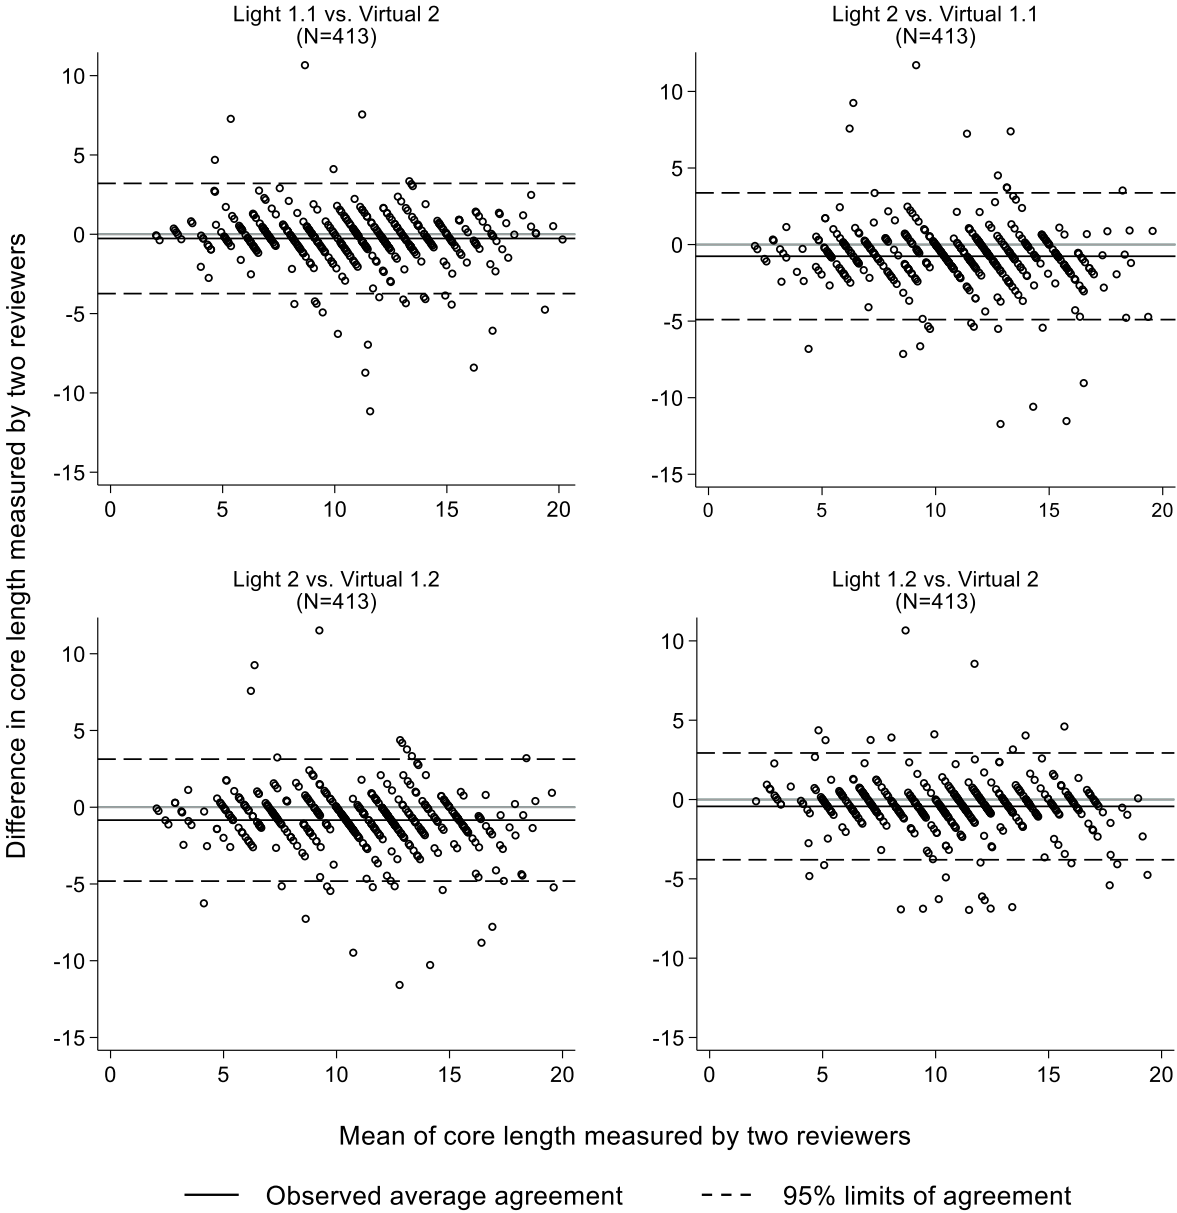

Supplementary Figure S17. Bland and Altman plot of the inter-method inter-observer agreement for the length of tumor in the biopsy core measured in millimeters, evaluated on the core level

Abbreviations: Light 1.1, First review by Reviewer 1 on light microscopy; Virtual 2, Reviewer 2 on virtual microscopy; Light 2, Reviewer 2 on light microscopy; Virtual 1.1, First review by Reviewer 1 on virtual microscopy; Virtual 1.2, Second review by Reviewer 1 on virtual microscopy; Light 1.2, Second review by Reviewer 1 on light microscopy

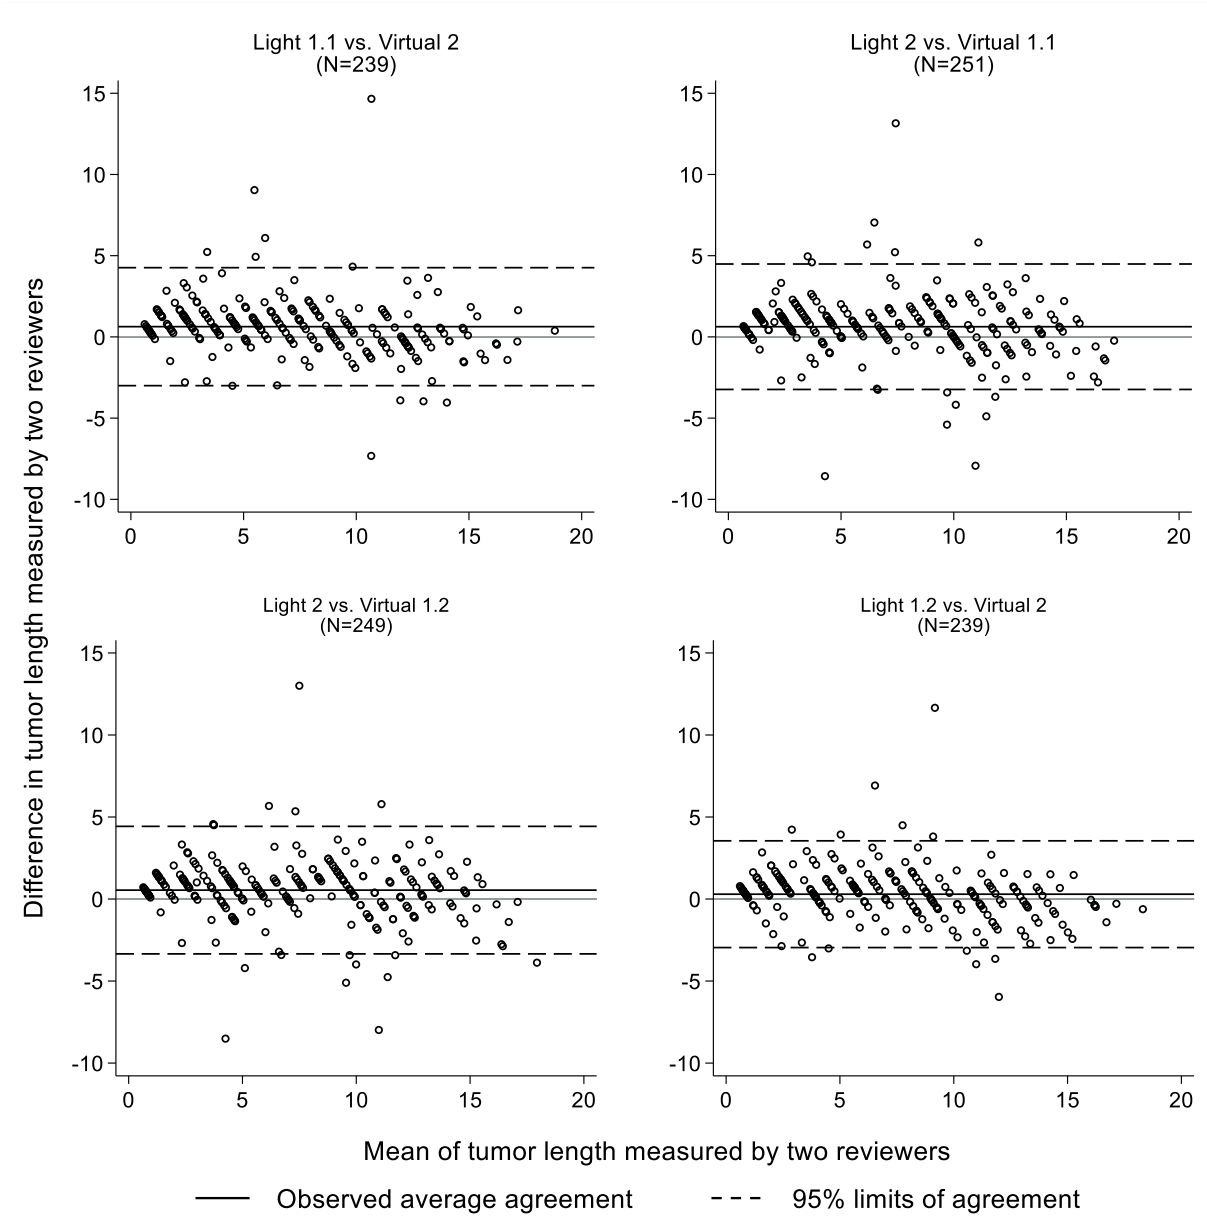

Supplementary Figure S18. Inter-method inter-observer agreement for characteristics evaluated on the core level

Abbreviations: Light 1.1, First review by Reviewer 1 on light microscopy; Virtual 2, Reviewer 2 on virtual microscopy; Light 2, Reviewer 2 on light microscopy; Virtual 1.1, First review by Reviewer 1 on virtual microscopy; Virtual 1.2, second review by Reviewer 1 on virtual microscopy; Light 1.2, second review by Reviewer 1 on light microscopy

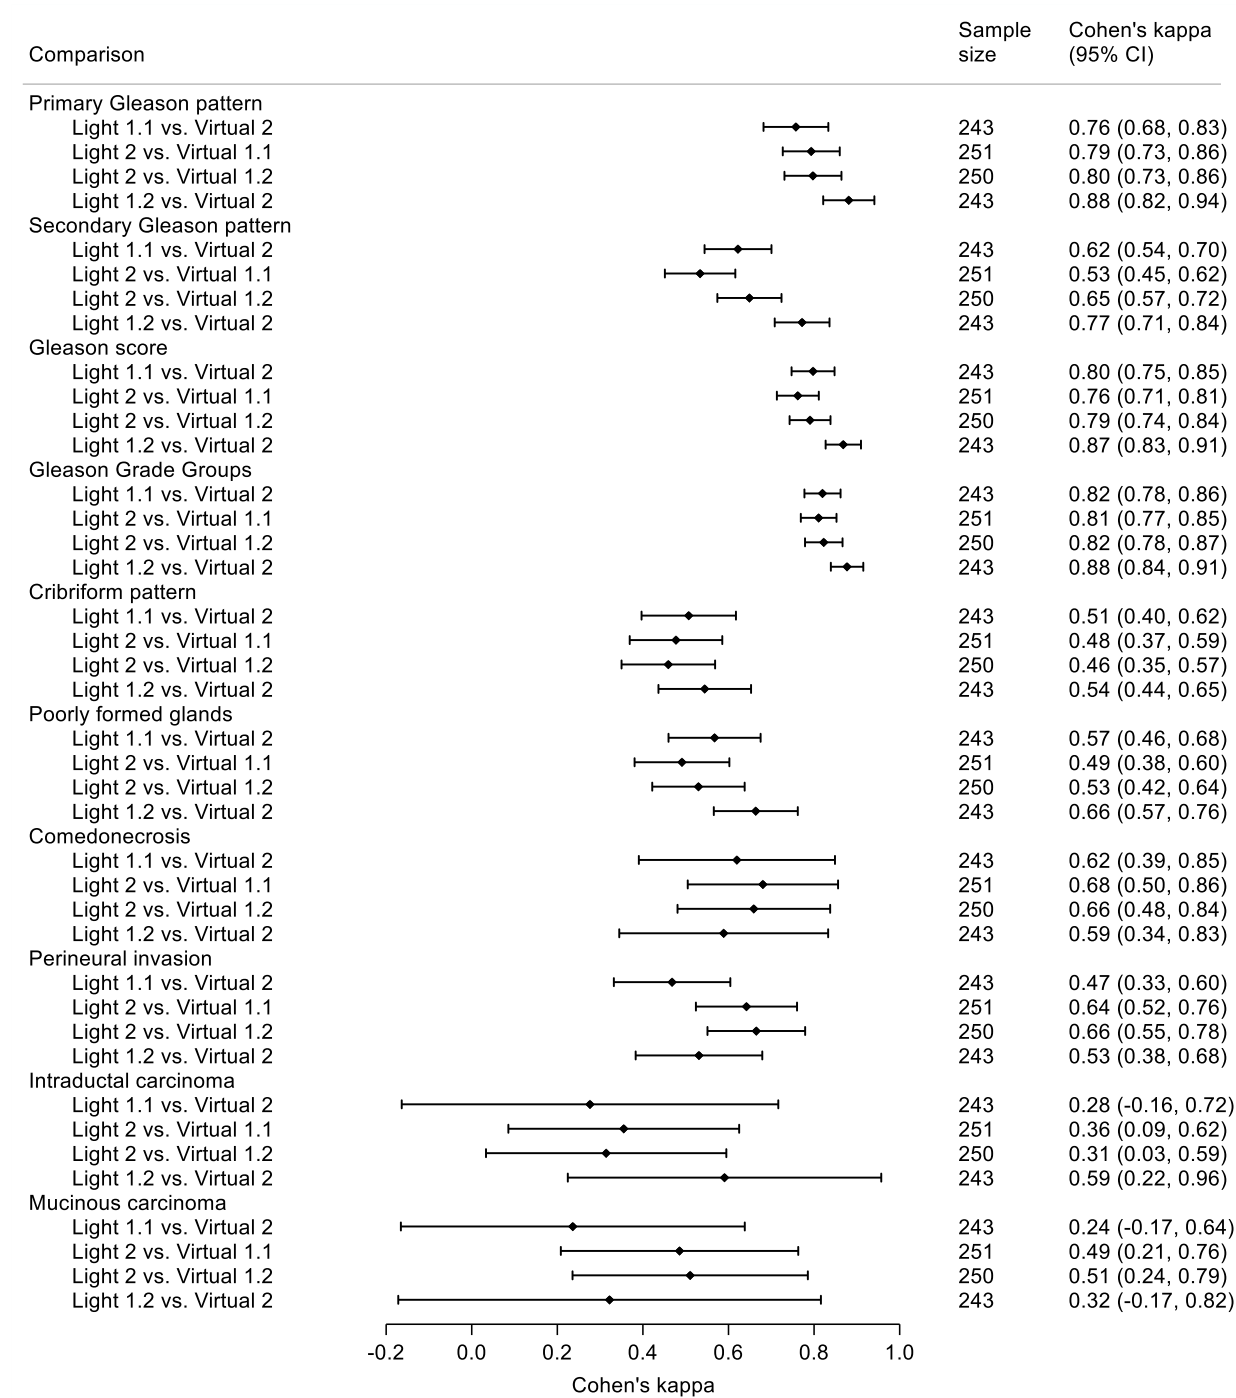

Supplementary Figure S19. Inter-method inter-observer agreement for characteristics evaluated on the slide level

Abbreviations: CI, confidence interval; Light 1.1, First review by Reviewer 1 on light microscopy; Virtual 2, Reviewer 2 on virtual microscopy; Light 2, Reviewer 2 on light microscopy; Virtual 1.1, First review by Reviewer 1 on virtual microscopy; Virtual 1.2, second review by Reviewer 1 on virtual microscopy; Light 1.2, second review by Reviewer 1 on light microscopy

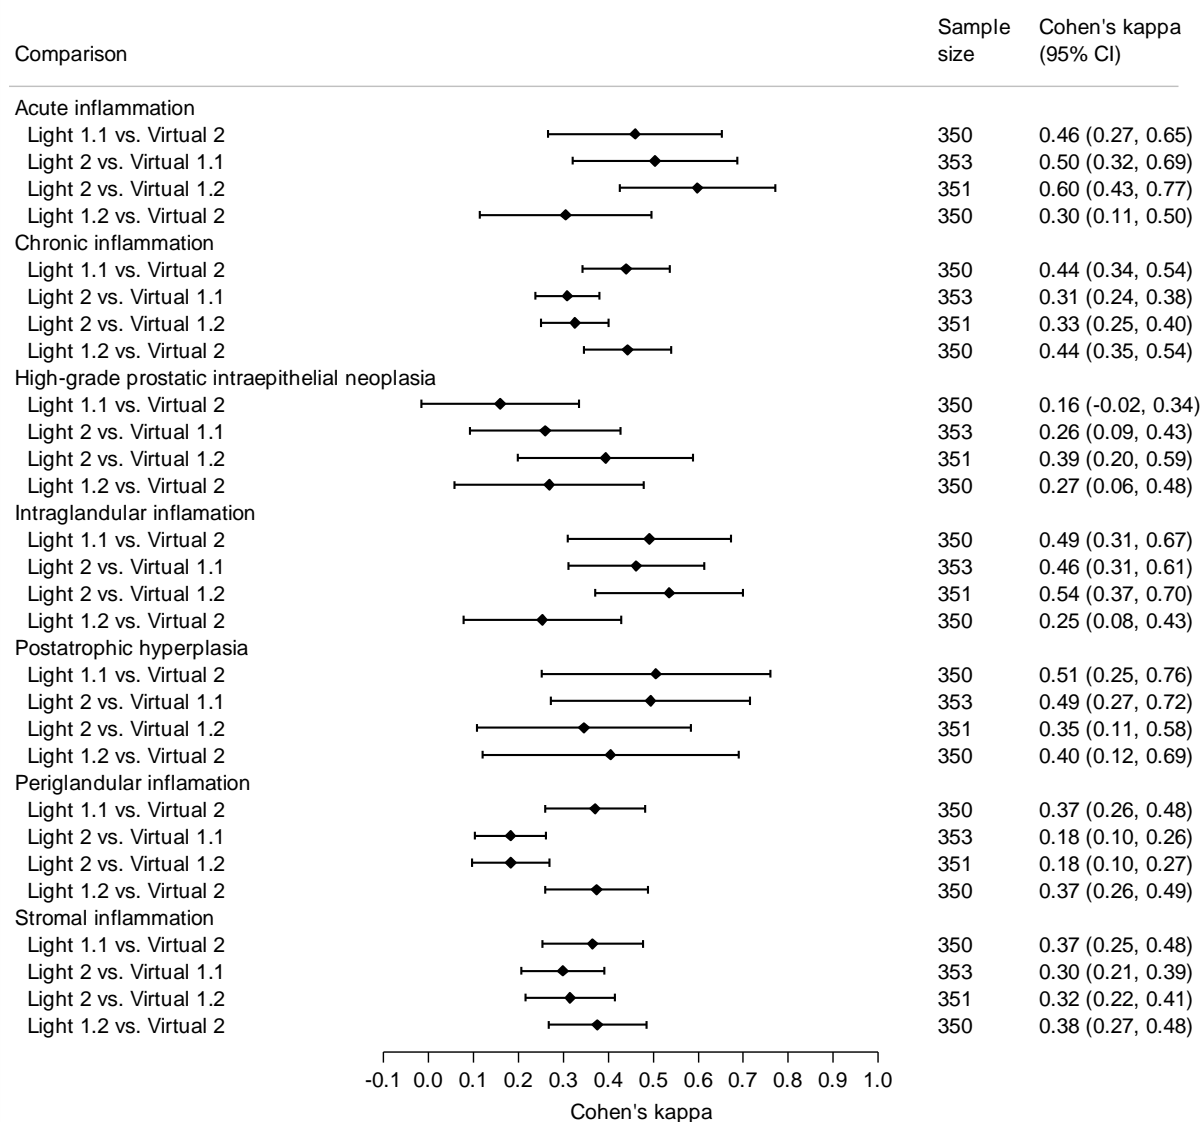

Supplementary Figure S20. Bland and Altman plot of the inter-method inter-observer agreement for the percentage of Gleason pattern 4, evaluated on the core level

Abbreviations: Light1.1, First review by Reviewer 1 on light microscopy; Virtual2, Reviewer 2 on virtual microscopy; Light2, Reviewer2 on light microscopy; Virtual1.1, First review by Reviewer 1 on virtual microscopy; Virtual1.2, second review by Reviewer1 on virtual microscopy; Light1.2, second review by Reviewer1 on light microscopy

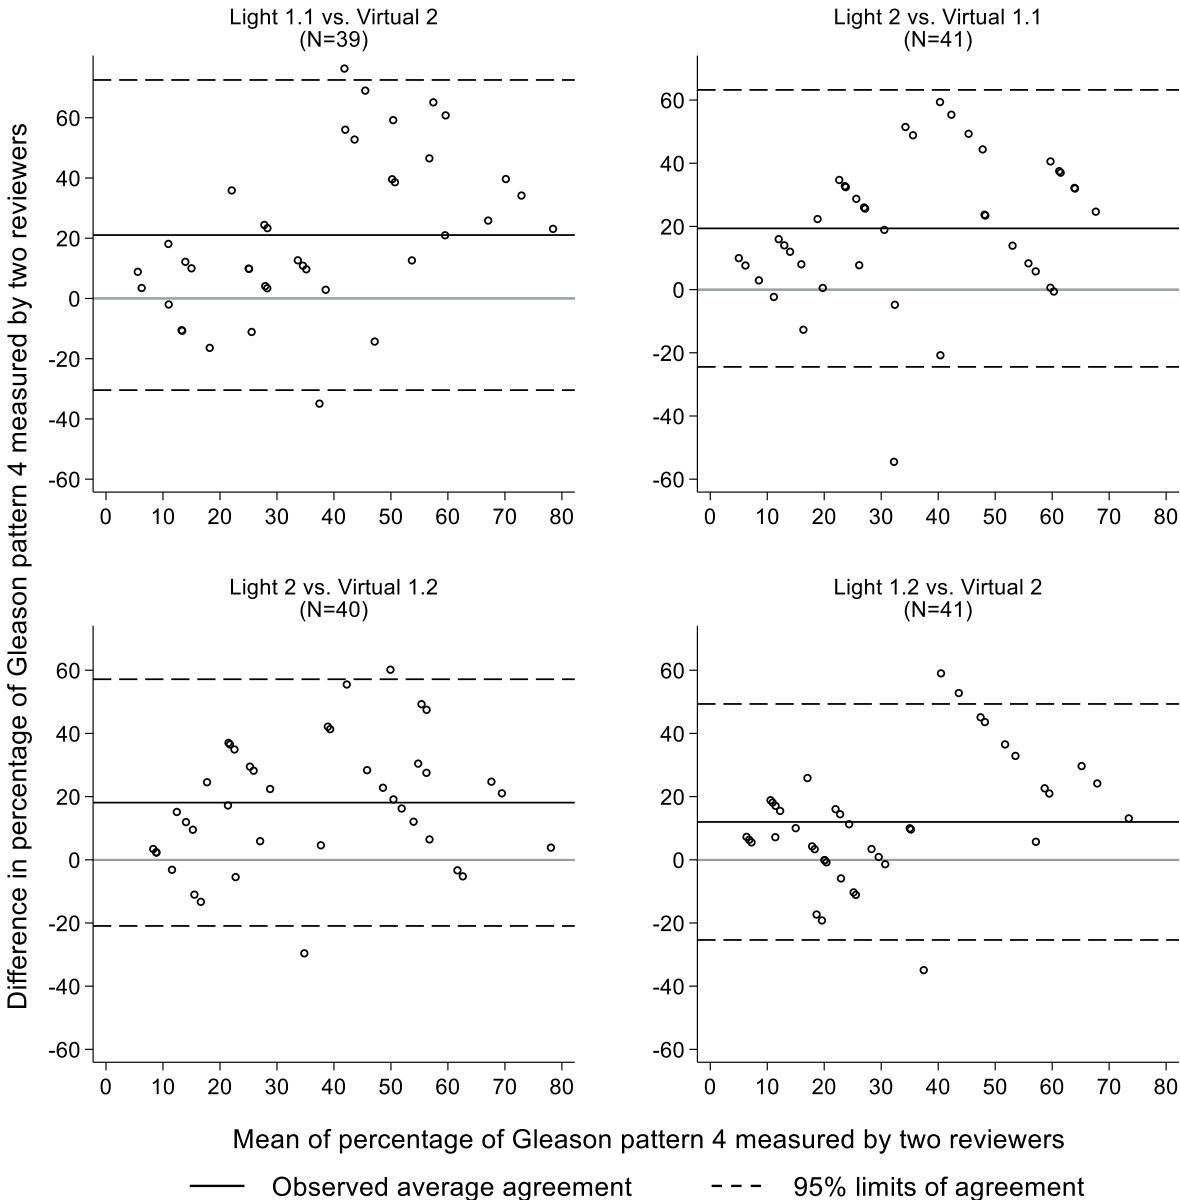

Supplementary Figure S21. Bland and Altman plot of the intra-method intra-observer agreement for the total biopsy length measured in millimeters, evaluated on the case level

Abbreviations: Light 1.1, First review by Reviewer 1 on light microscopy; Light 1.2, Second review by Reviewer 1 on light microscopy; Virtual 1.1, First review by Reviewer 1 on virtual microscopy; Virtual 1.2, Second review by Reviewer 1 on virtual microscopy

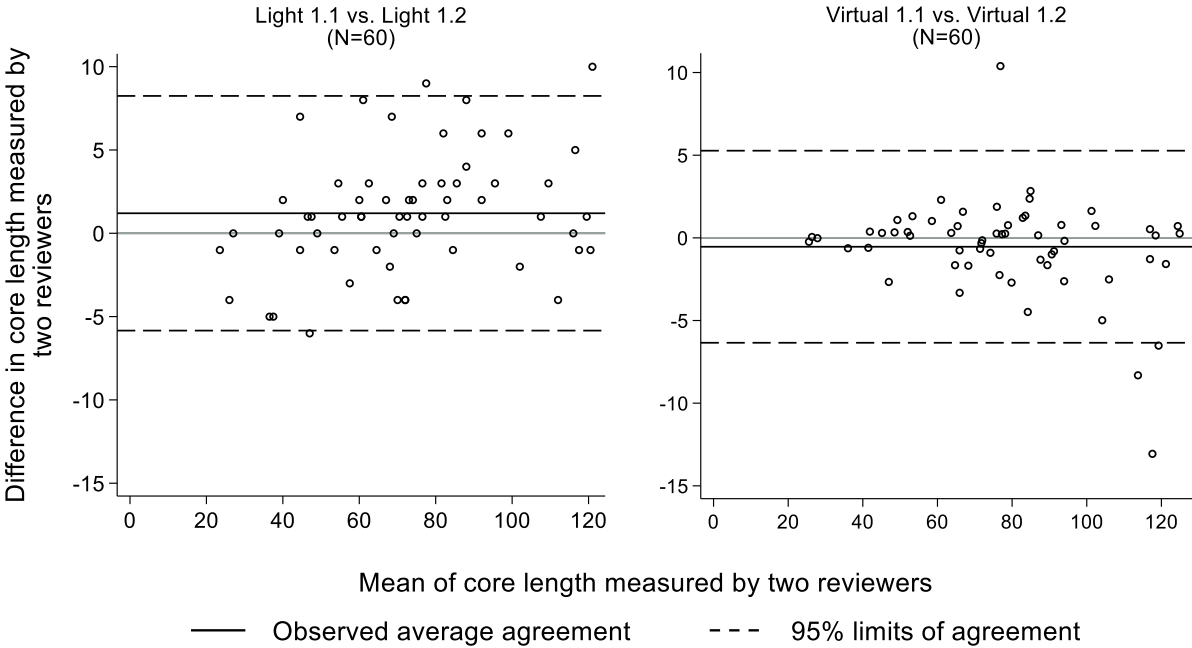

Supplementary Figure S22. Bland and Altman plot of the intra-method intra-observer agreement for the total length of tumor in the biopsy measured in millimeters, evaluated on the case level

Abbreviations: Light 1.1, First review by Reviewer 1 on light microscopy; Light 1.2, Second review by Reviewer 1 on light microscopy; Virtual 1.1, First review by Reviewer 1 on virtual microscopy; Virtual 1.2, Second review by Reviewer 1 on virtual microscopy

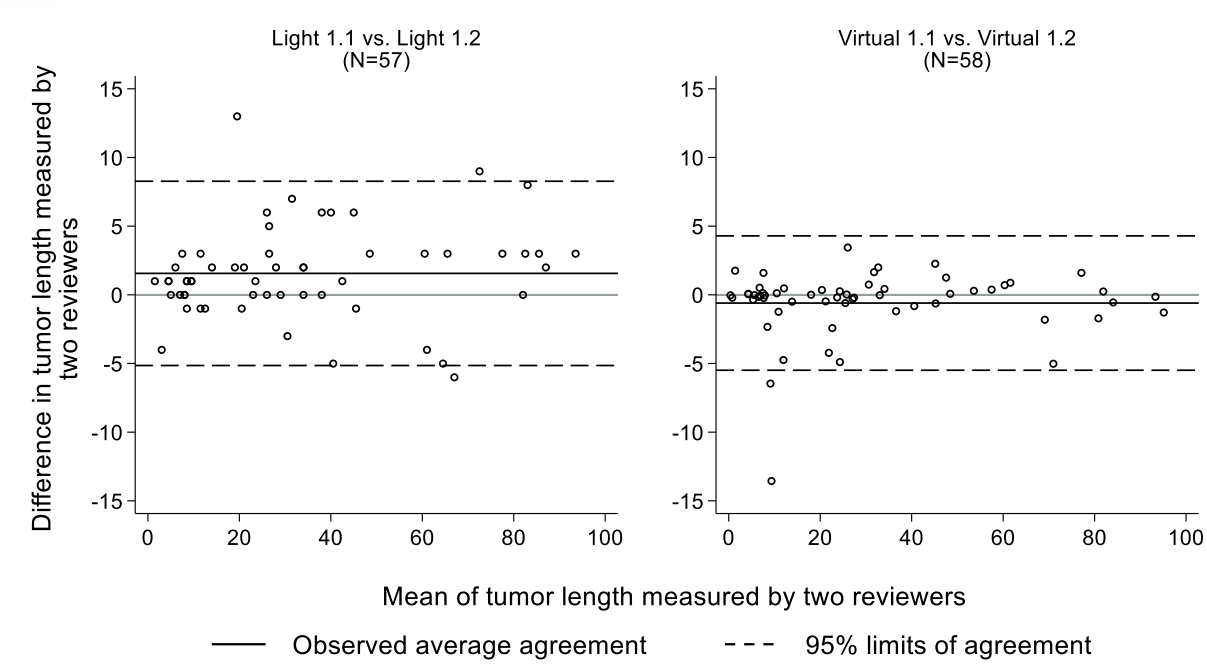

Supplementary Figure S23. Intra-method intra-observer agreement evaluated on the case level

Abbreviations: Light 1.1, First review by Reviewer 1 on light microscopy; Light 1.2, Second review by Reviewer 1 on light microscopy; Virtual 1.1, First review by Reviewer 1 on virtual microscopy; Virtual 1.2, Second review by Reviewer 1 on virtual microscopy

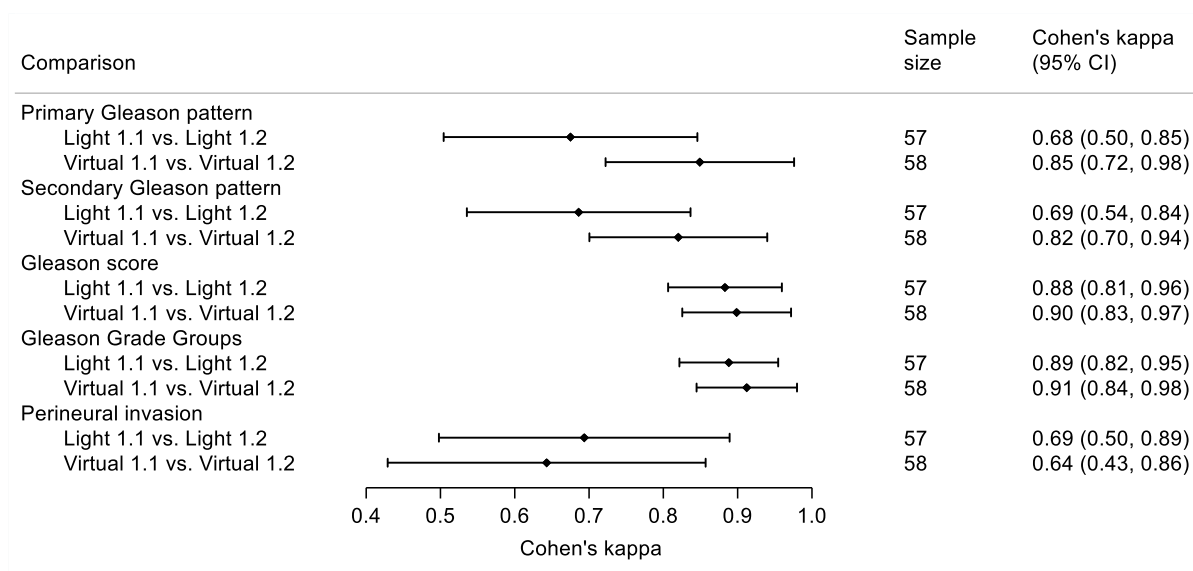



Supplementary Figure S24. Bland and Altman plot of the intra-method inter-observer agreement for the total biopsy length measured in millimeters, evaluated on the case level

Abbreviations: Light 1.1, First review by Reviewer 1 on light microscopy; Light 2, Reviewer 2 on light microscopy; Light 1.2, Second review by Reviewer 1 on light microscopy; Virtual 1.1, First review by Reviewer 1 on virtual microscopy; Virtual 2, Reviewer 2 on virtual microscopy; Virtual 1.2, Second review by Reviewer 1 on virtual microscopy

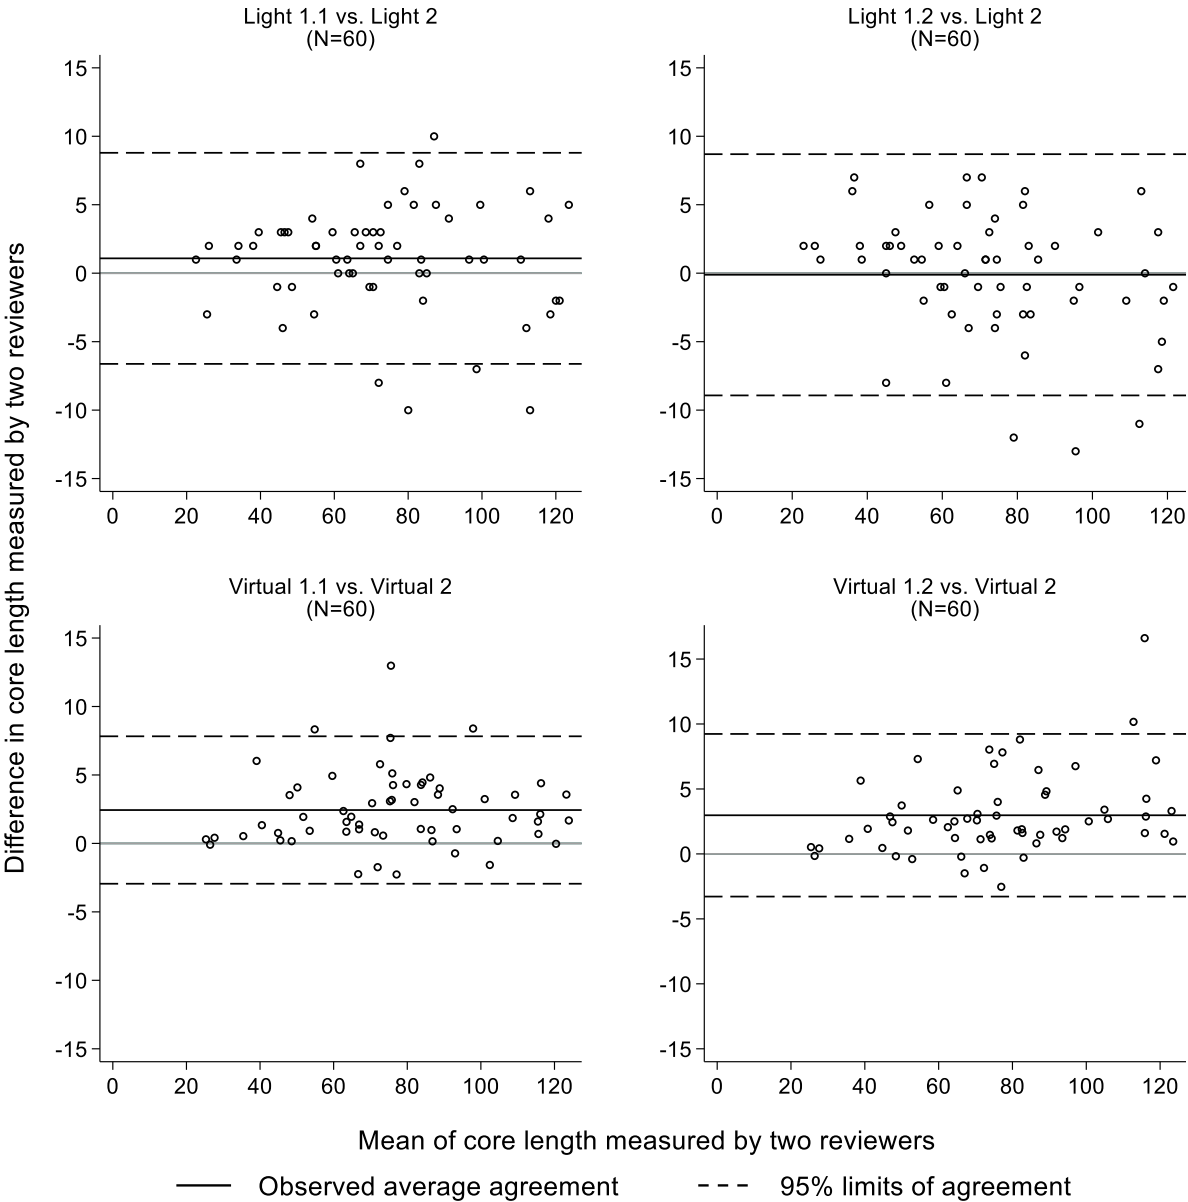

Supplementary Figure S25. Bland and Altman plot of the intra-method inter-observer agreement for the total length of tumor in the biopsy measured in millimeters evaluated on the case level

Abbreviations: Light 1.1, First review by Reviewer 1 on light microscopy; Light 2, Reviewer 2 on light microscopy; Light 1.2, Second review by Reviewer 1 on light microscopy; Virtual 1.1, First review by Reviewer 1 on virtual microscopy; Virtual 2, Reviewer 2 on virtual microscopy; Virtual 1.2, Second review by Reviewer 1 on virtual microscopy

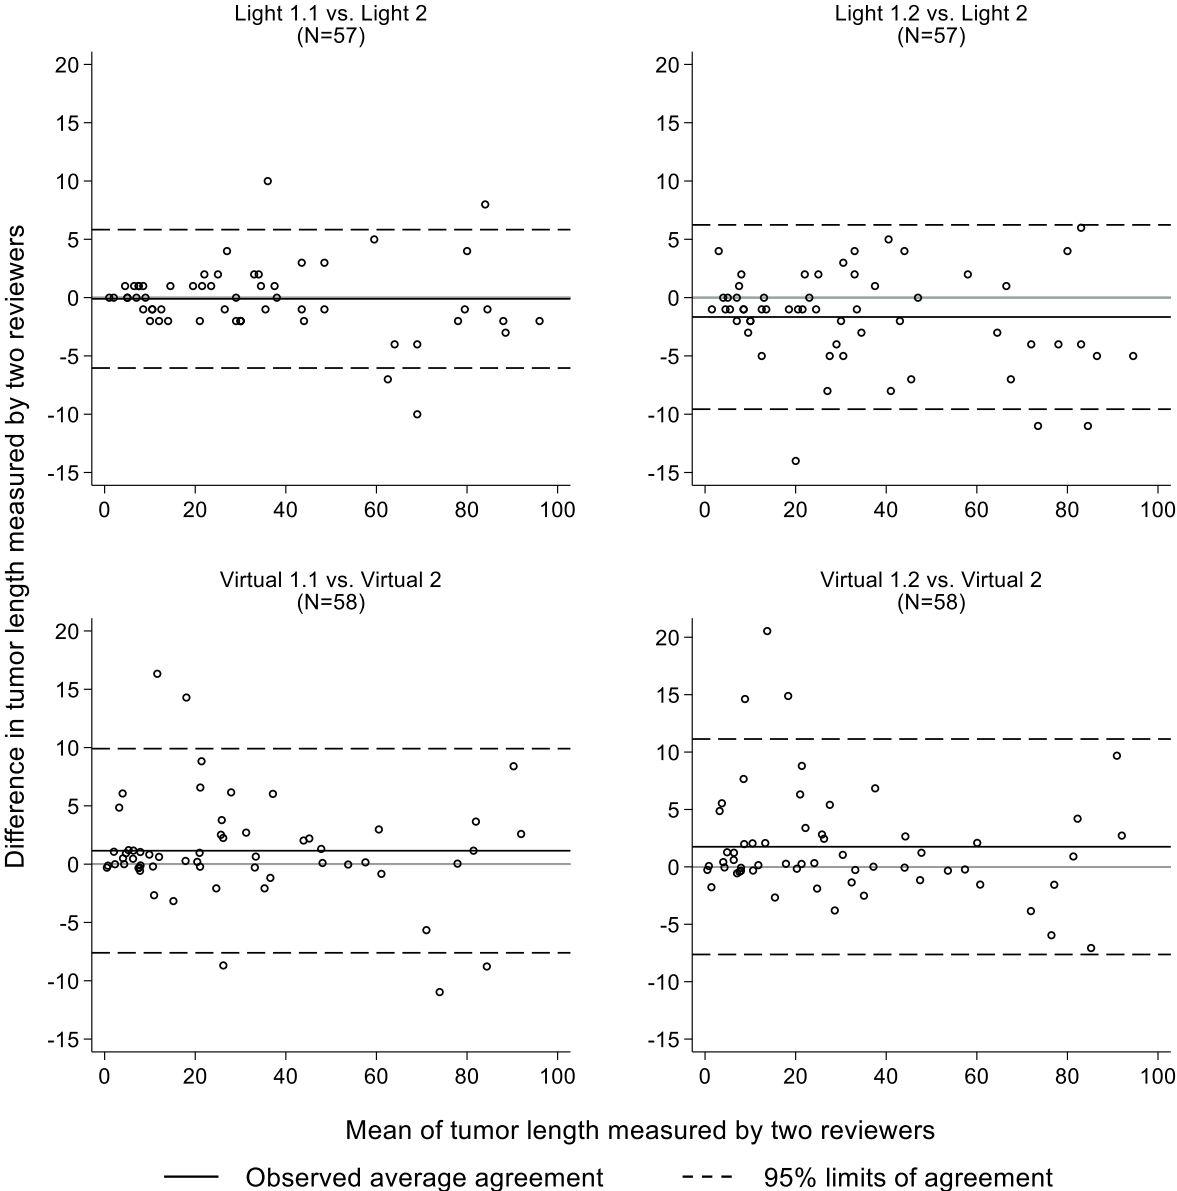

Supplementary Figure S26. Intra-method inter-observer agreement evaluated on the case level

Abbreviations: Light 1.1, First review by Reviewer 1 on light microscopy; Light 2, Reviewer 2 on light microscopy; Light 1.2, Second review by Reviewer 1 on light microscopy; Virtual 1.1, First review by Reviewer 1 on virtual microscopy; Virtual 2, Reviewer 2 on virtual microscopy; Virtual 1.2, Second review by Reviewer 1 on virtual microscopy

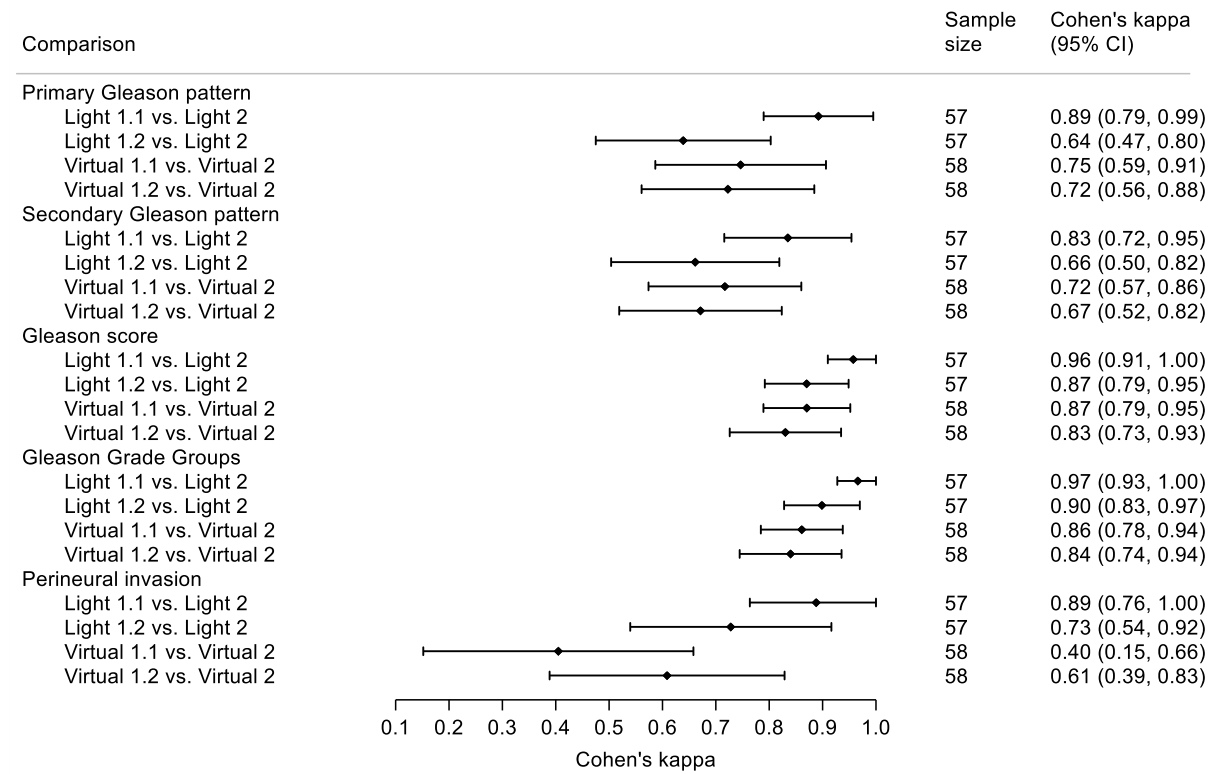

Supplementary Figure S27. Bland and Altman plot of the inter-method intra-observer agreement for the total biopsy length measured in millimeters, evaluated on the case level

Abbreviations: Light 1.1, First review by Reviewer 1 on light microscopy; Virtual 1.1, First review by Reviewer 1 on virtual microscopy; Virtual 1.2, Second review by Reviewer 1 on virtual microscopy; Light 2, Reviewer 2 on light microscopy; Virtual 2, Reviewer 2 on virtual microscopy; Light 1.2, Second review by Reviewer 1 on light microscopy

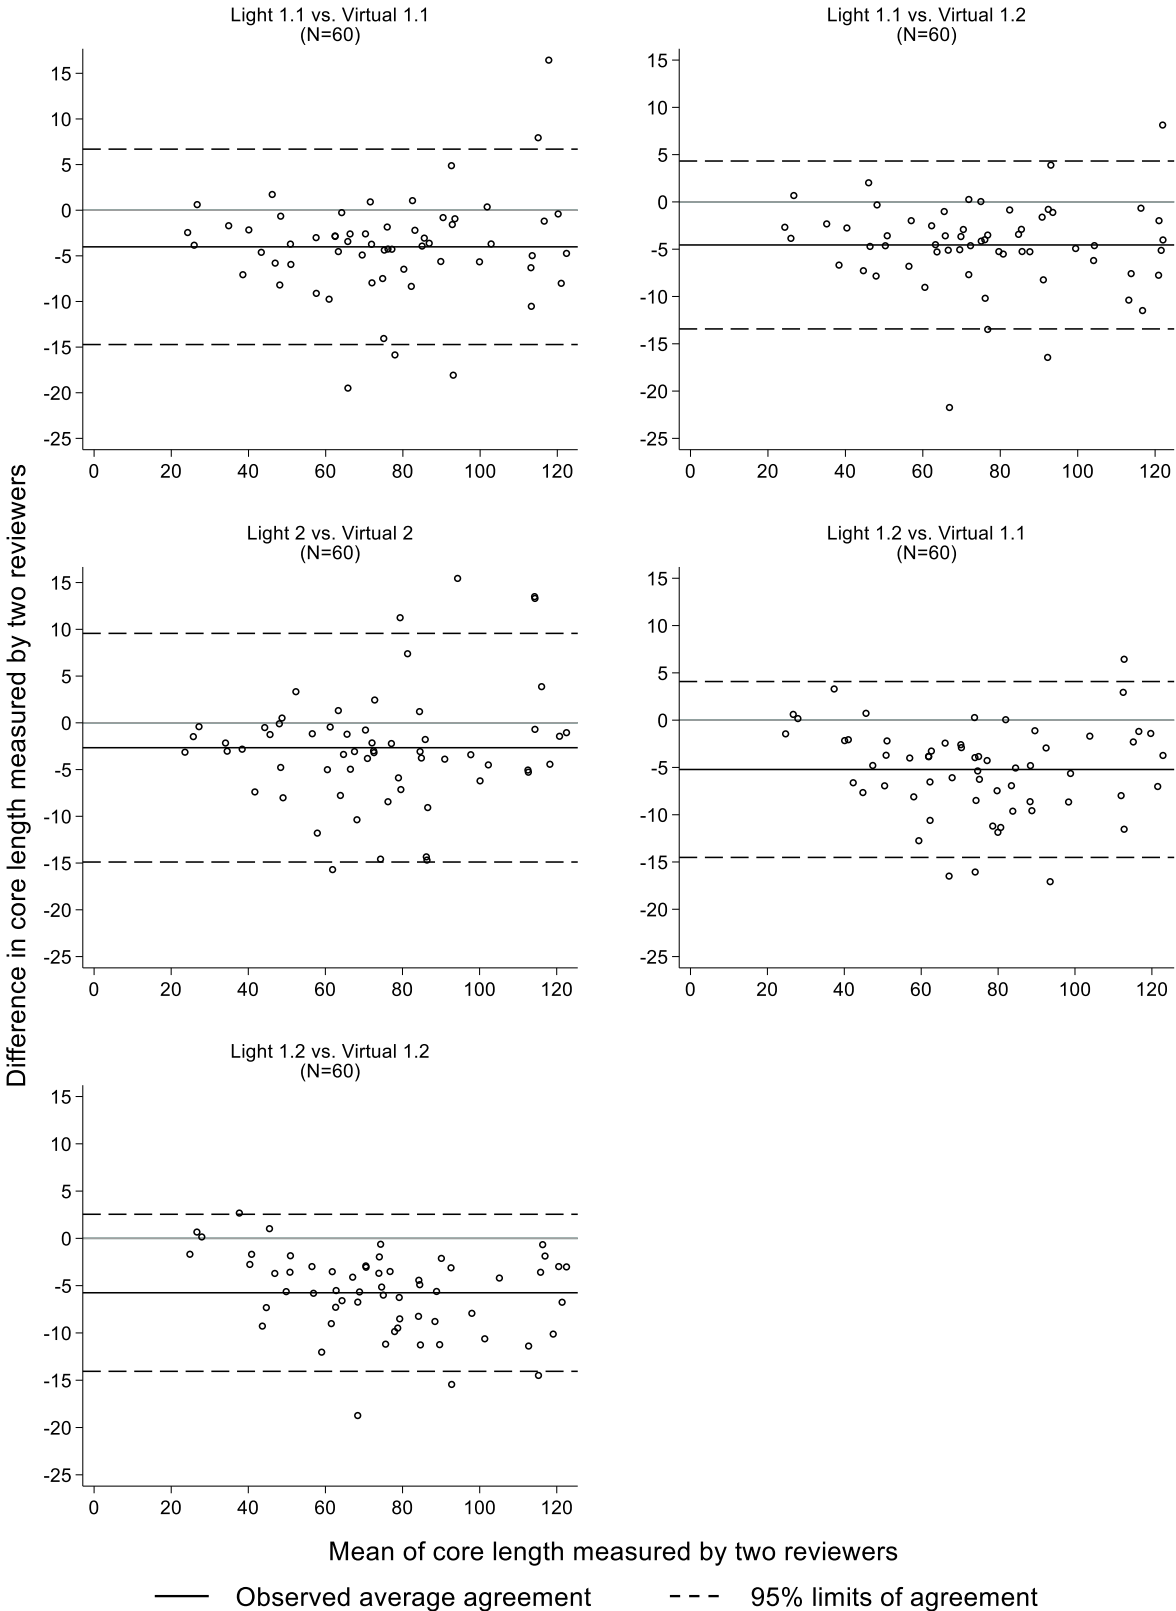

Supplementary Figure S28. Bland and Altman plot of the inter-method intra-observer agreement for the total length of tumor in the biopsy measured in millimeters, evaluated on the case level

Abbreviations: Light 1.1, First review by Reviewer 1 on light microscopy; Virtual 1.1, First review by Reviewer 1 on virtual microscopy; Virtual 1.2, Second review by Reviewer 1 on virtual microscopy; Light 2, Reviewer 2 on light microscopy; Virtual 2, Reviewer 2 on virtual microscopy; Light 1.2, Second review by Reviewer 1 on light microscopy

Note: Red lines show limits of agreement when outlier was removed from the analysis

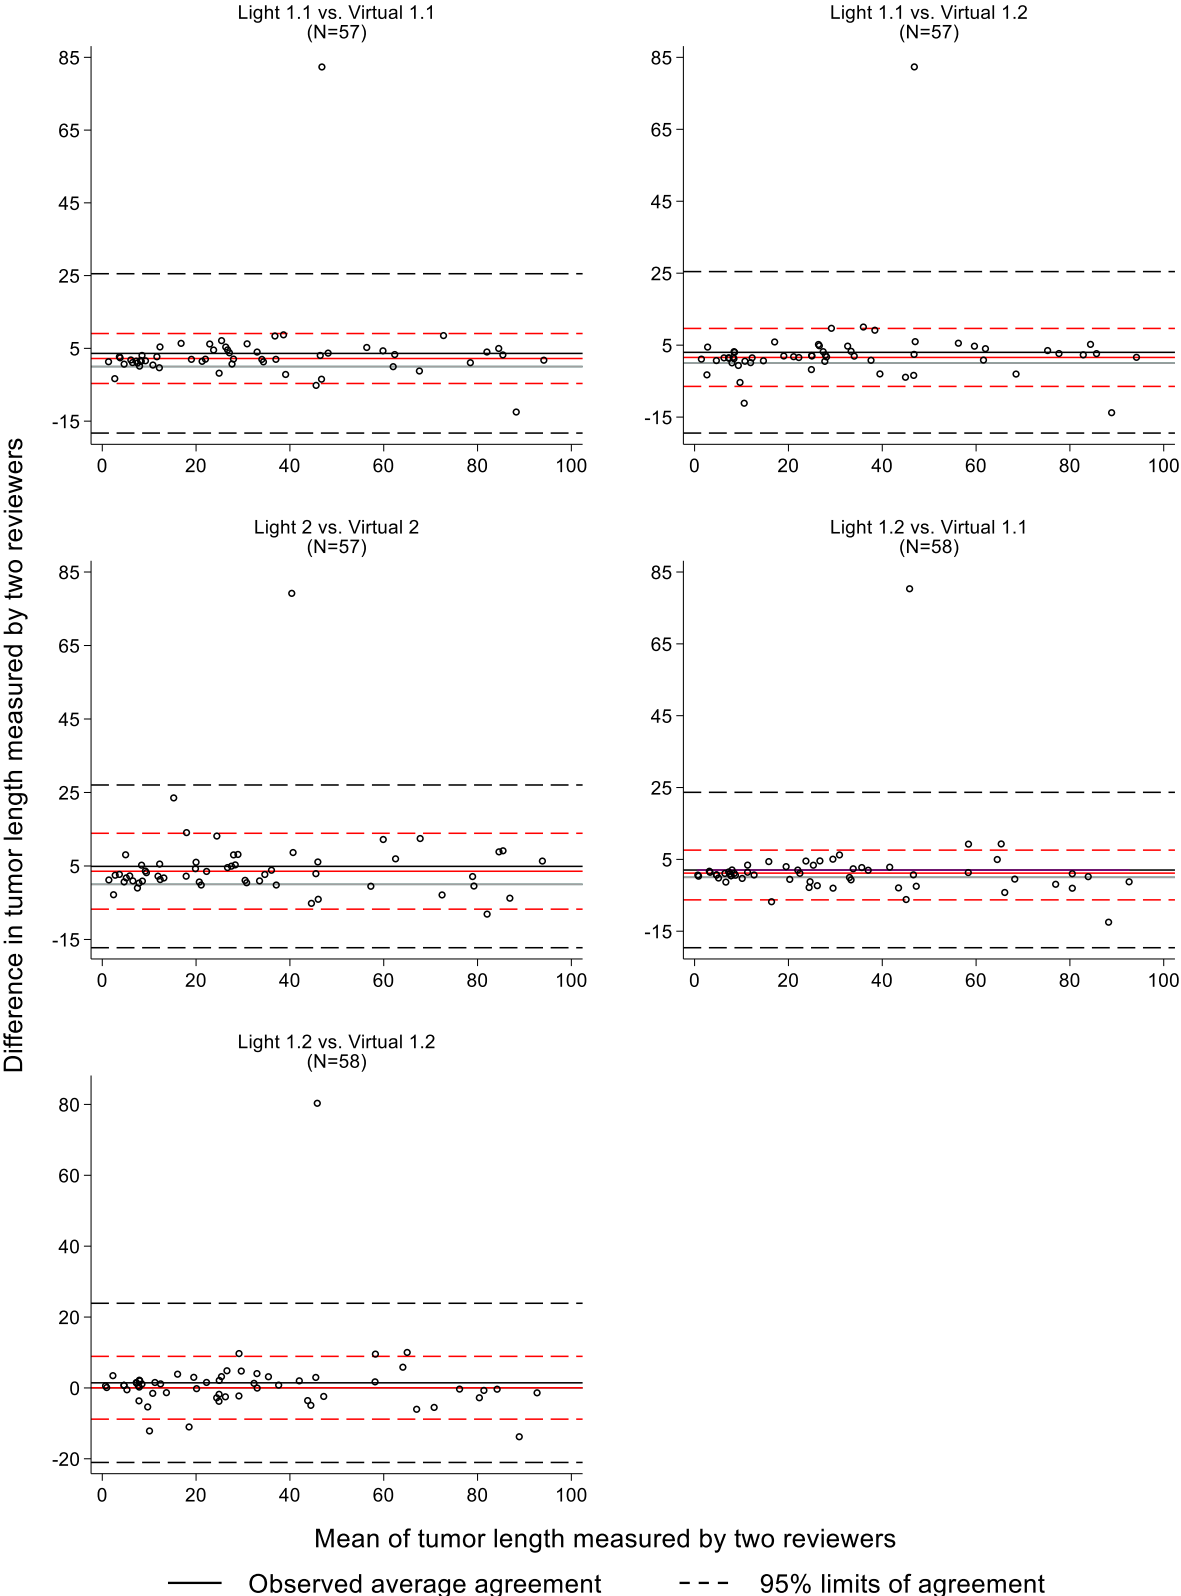

Supplementary Figure S29. Inter-method intra-observer agreement evaluated on the case level

Abbreviations: Light 1.1, First review by Reviewer 1 on light microscopy; Virtual 1.1, First review by Reviewer 1 on virtual microscopy; Virtual 1.2, Second review by Reviewer 1 on virtual microscopy; Light 2, Reviewer 2 on light microscopy; Virtual 2, Reviewer 2 on virtual microscopy; Light 1.2, Second review by Reviewer 1 on light microscopy

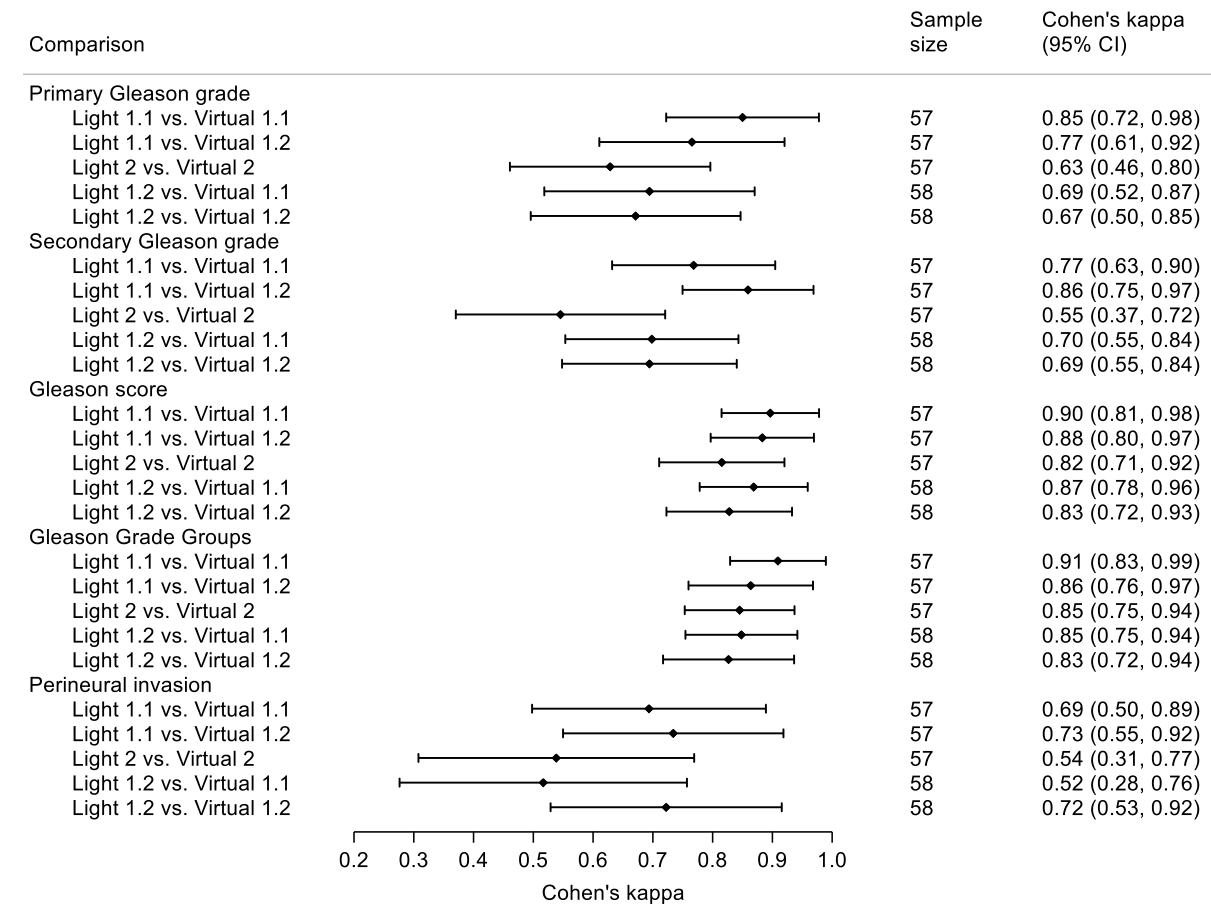

Supplementary Figure S30. Bland and Altman plot of the inter-method inter-observer agreement for the total biopsy length measured in millimeters, evaluated on the case level

Abbreviations: Light 1.1, First review by Reviewer 1 on light microscopy; Virtual 2, Reviewer 2 on virtual microscopy; Light 2, Reviewer 2 on light microscopy; Virtual 1.1, First review by Reviewer 1 on virtual microscopy; Virtual 1.2, second review by Reviewer 1 on virtual microscopy; Light 1.2, second review by Reviewer 1 on light microscopy

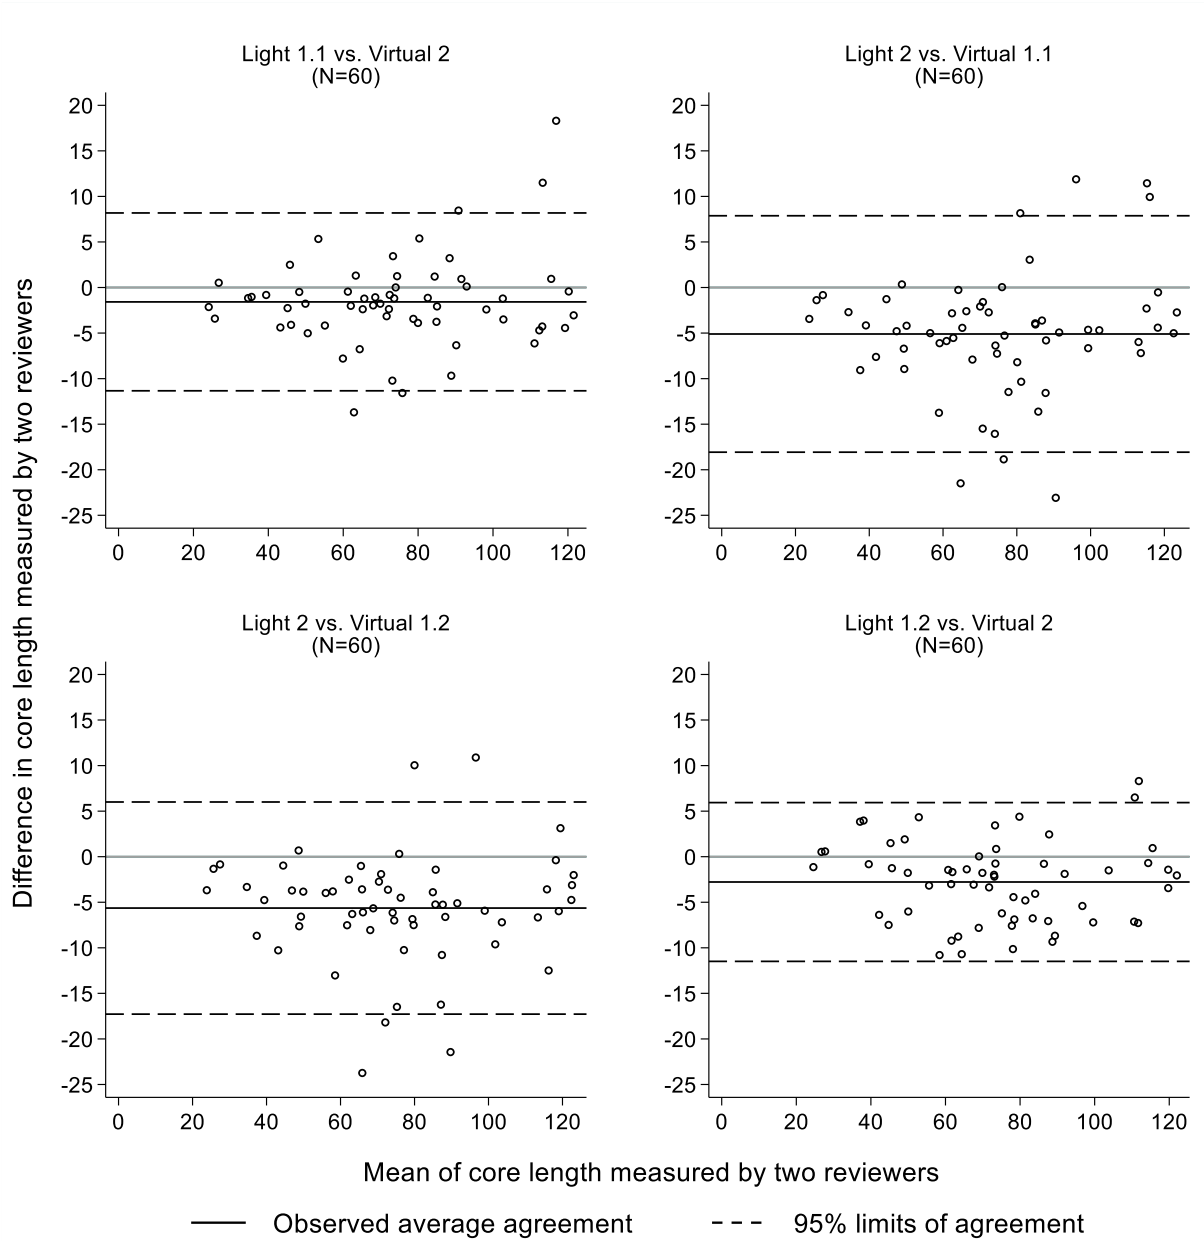

Supplementary Figure S31. Bland and Altman plot of the inter-method inter-observer agreement for the total length of tumor in the biopsy measured in millimeters, evaluated on the case level

Abbreviations: Light 1.1, First review by Reviewer 1 on light microscopy; Virtual 2, Reviewer 2 on virtual microscopy; Light 2, Reviewer 2 on light microscopy; Virtual 1.1, First review by Reviewer 1 on virtual microscopy; Virtual 1.2, second review by Reviewer 1 on virtual microscopy; Light 1.2, second review by Reviewer 1 on light microscopy

Note: Red lines show limits of agreement when outlier was removed from the analysis

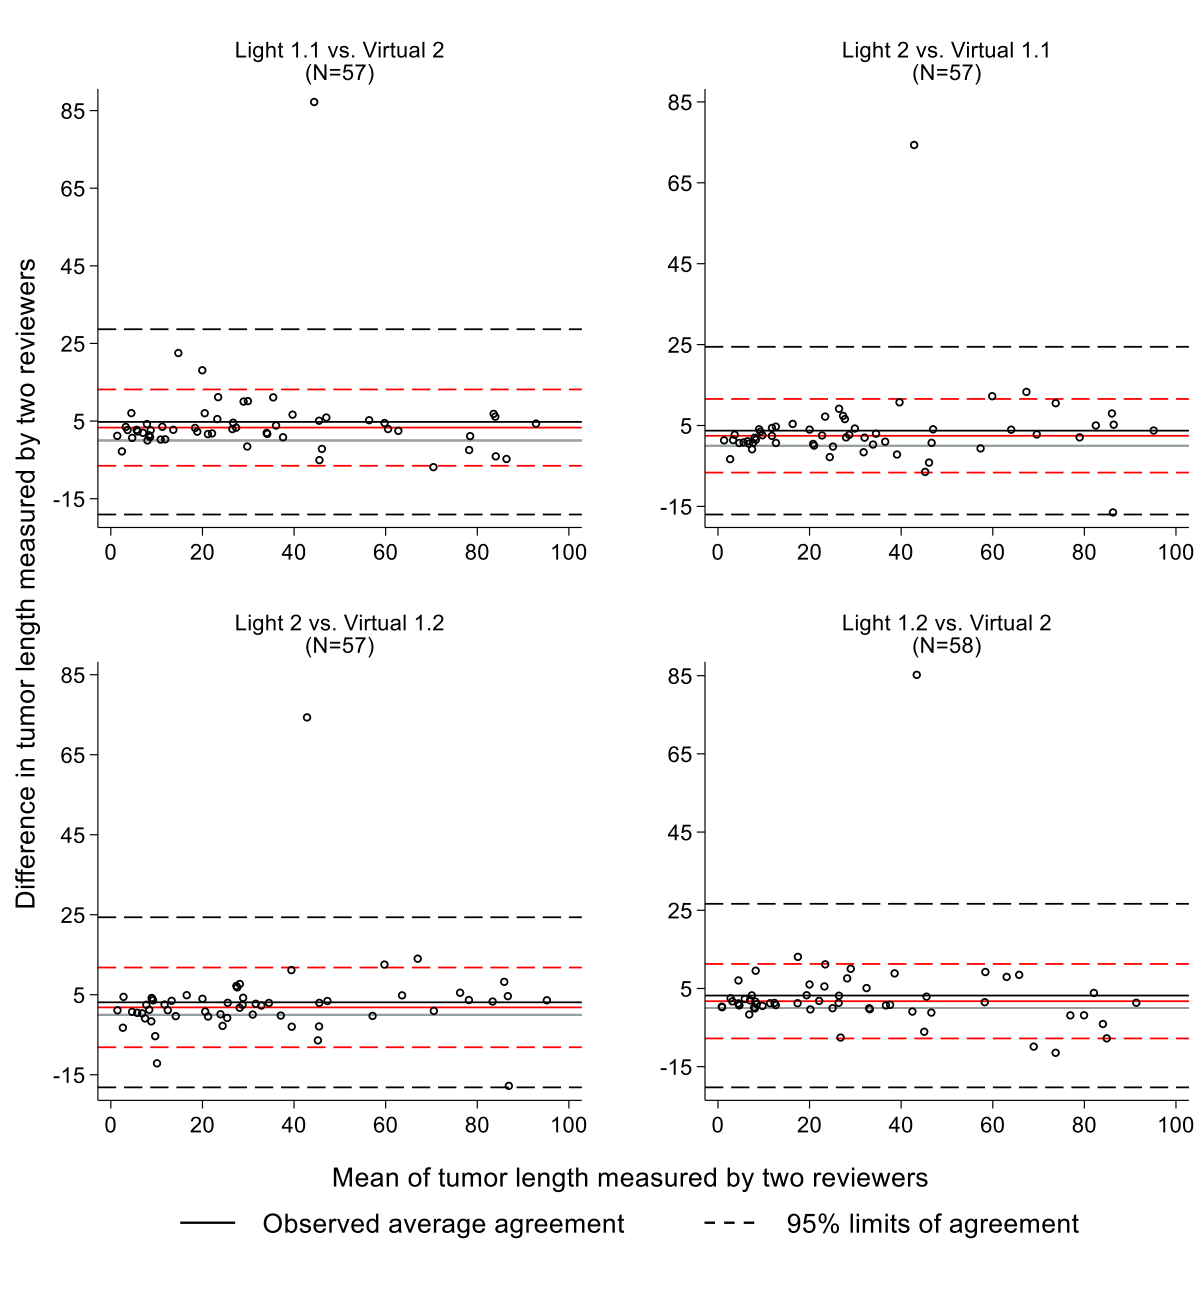



Supplementary Figure S32. Inter-method inter-observer agreement evaluated on the case level

Abbreviations: Light 1.1, First review by Reviewer 1 on light microscopy; Virtual 2, Reviewer 2 on virtual microscopy; Light 2, Reviewer 2 on light microscopy; Virtual 1.1, First review by Reviewer 1 on virtual microscopy; Virtual 1.2, second review by Reviewer 1 on virtual microscopy; Light 1.2, second review by Reviewer 1 on light microscopy

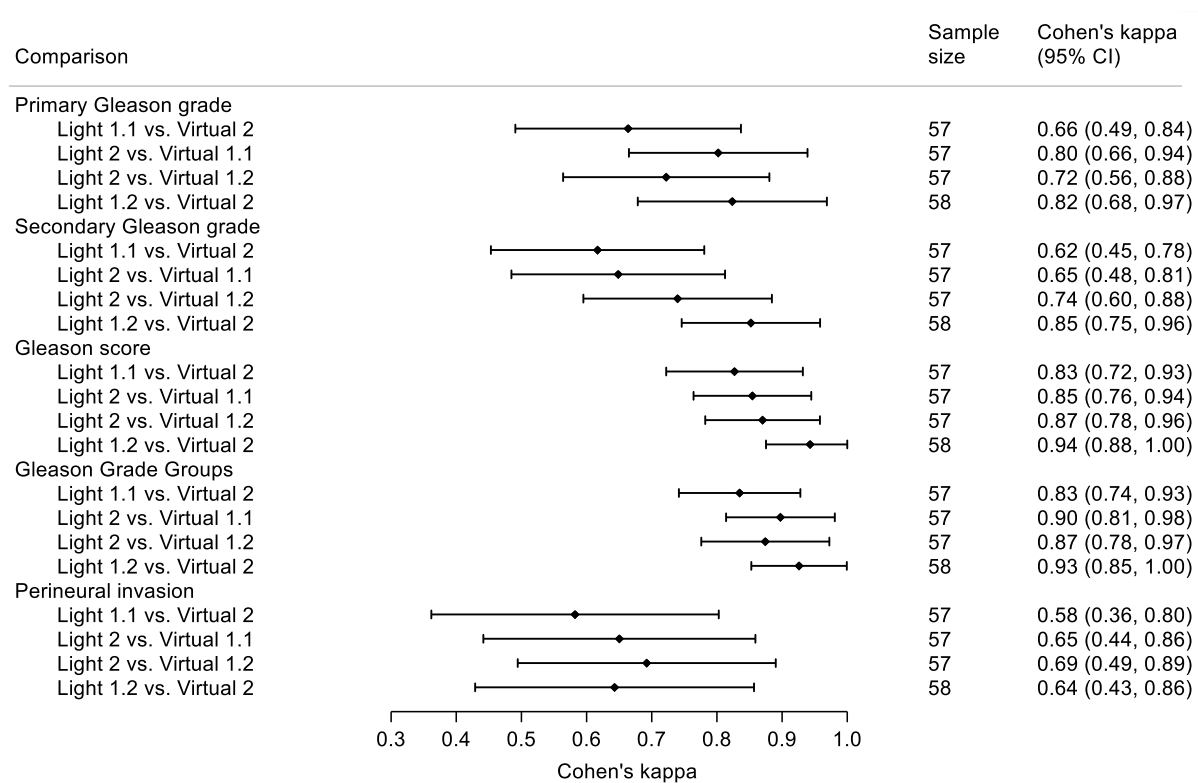

Supplement: MOESM1 [file 41598_2021_82911_MOESM1_ESM.pdf]
